# Supplementary material
Source: publisher figshare collection journal article supplement (https://acs.figshare.com/ndownloader/files/23857149)

# Photoredox-Enabled Synthesis of $\beta$ -Substituted Pyrroles from Pyrrolidines

Xiao-De An,<sup>†, §</sup> Shuo Yang,<sup>†, §</sup> Bin Qiu,<sup>†</sup> Ting-Ting Yang,<sup>†</sup> Xian-Jiang Li,<sup>⊥</sup> Jian Xiao\*,<sup>†, ‡</sup>

<sup>†</sup> College of Chemistry and Pharmaceutical Sciences, Qingdao Agricultural University, Qingdao 266109, China

<sup>‡</sup> School of Marine Science and Engineering, Qingdao Agricultural University, Qingdao, 266109, China

<sup>⊥</sup> Shandong Kangqiao Biotechnology Co. Ltd., Binzhou, 256500, China

E-mail: chemjianxiao@163.com.

## Supporting Information

### Table of Contents

|                                                                        |    |
|------------------------------------------------------------------------|----|
| 1. List of the Starting Materials.....                                 | S2 |
| 2. Optimization of Photocatalysts.....                                 | S2 |
| 3. Reaction Set-up for Synthesis of $\beta$ -Substituted Pyrroles..... | S3 |
| 4. Mechanistic Study of Aromatization.....                             | S3 |
| 5. NMR Spectra for All Compounds.....                                  | S5 |

## 1. Scheme S1. List of the Starting Materials

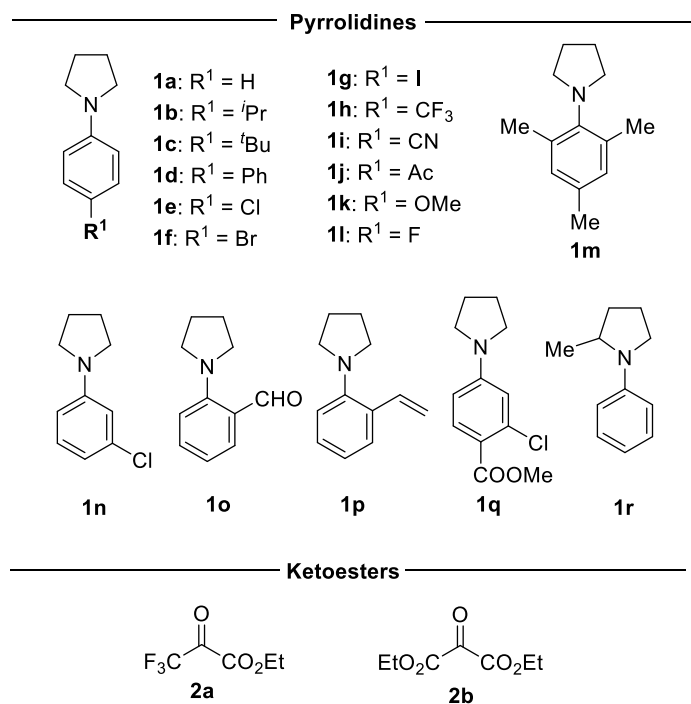

## 2. Table S1. Optimization of Photocatalysts.<sup>a</sup>

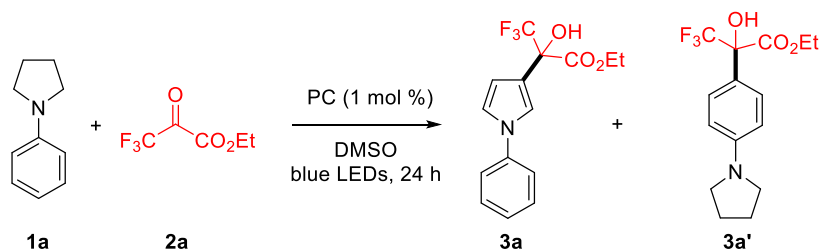

| entry | photocatalysts                                                   | yield of <b>3a</b> (%) <sup>b</sup> | yield of <b>3a'</b> (%) <sup>b</sup> |
|-------|------------------------------------------------------------------|-------------------------------------|--------------------------------------|
| 1     | Eosin Y                                                          | 29                                  | trace                                |
| 2     | Rhodamine B                                                      | 19                                  | trace                                |
| 3     | Ru(bpy) <sub>3</sub> (PF <sub>6</sub> ) <sub>2</sub>             | 33                                  | trace                                |
| 4     | Ru(bpy) <sub>3</sub> Cl <sub>2</sub> ·H <sub>2</sub> O           | 36                                  | trace                                |
| 5     | Ir(ppy) <sub>2</sub> (dtbbpy)PF <sub>6</sub>                     | 53                                  | trace                                |
| 6     | Ir[dF(CF <sub>3</sub> )ppy] <sub>2</sub> (dtbbpy)PF <sub>6</sub> | 53                                  | trace                                |
| 7     | Ir(ppy) <sub>3</sub>                                             | 27                                  | trace                                |
| 8     | -                                                                | -                                   | 66%                                  |

<sup>a</sup>Reaction conditions: a solution of **1a** (0.1 mmol), **2a** (0.25 mmol), PC (0.001 mmol) in the DMSO (1.0 mL) was irradiated by blue LED strips for 24 h under an air atmosphere. <sup>b</sup><sup>1</sup>H NMR yield.

### 3. Scheme S2. Reaction Set-up for Synthesis of $\beta$ -Substituted Pyrroles.

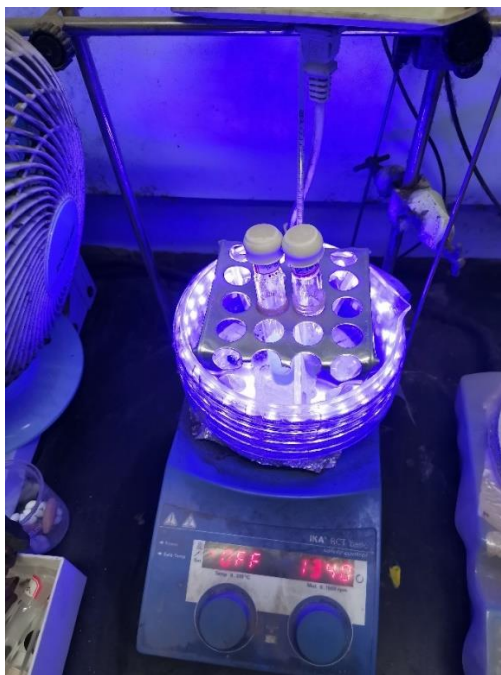

#### Reaction set-up

The LED light Strips (OPPLE 12-LE-38465, 4.5 W, 435 nm) are used as light source. The distance between the light source and the irradiation vessel is about 7 cm.

#### 4. Mechanistic Study of Aromatization

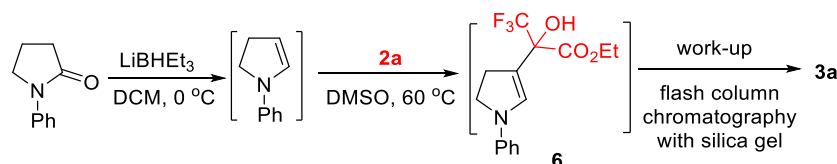

1-phenylpyrrolidin-2-one (806.0 mg, 1.0 mmol) was added into an oven-dried 100 mL reaction tube which was equipped with a rubber stopper and magnetic stir. The flask was evacuated and backfilled with  $\text{N}_2$  for 3 times. Then,  $\text{DCM}$  (25 mL) was added. The reaction mixture was stirred at  $0\text{ }^\circ\text{C}$  for 30 min, and then  $\text{LiBHEt}_3$  (1.1 mmol, 1.1equiv.) was added into this system via a syringe. After stirring at  $0\text{ }^\circ\text{C}$  for 10 min, **2a** (1.1 mmol, 1.1equiv.) was then added and the reaction mixture was stirred at  $60\text{ }^\circ\text{C}$  for 10 h. The progress of the reaction was monitored by TLC, and a new spot **A** appeared. After the reaction was completed, the solvent was evaporated and the residue was subjected to a flash silica gel chromatography ( $\text{EtOAc} : \text{hexane} = 1:20$ ). Finally, the isolated product was **3a**, which is different from the above spot **A** on

TLC. This result suggested that the aromatization of the  $\alpha,\beta$ -unsaturated amine **6** could be achieved by the atmospheric oxygen involved oxidation.

## 5. NMR Spectra for All Compounds

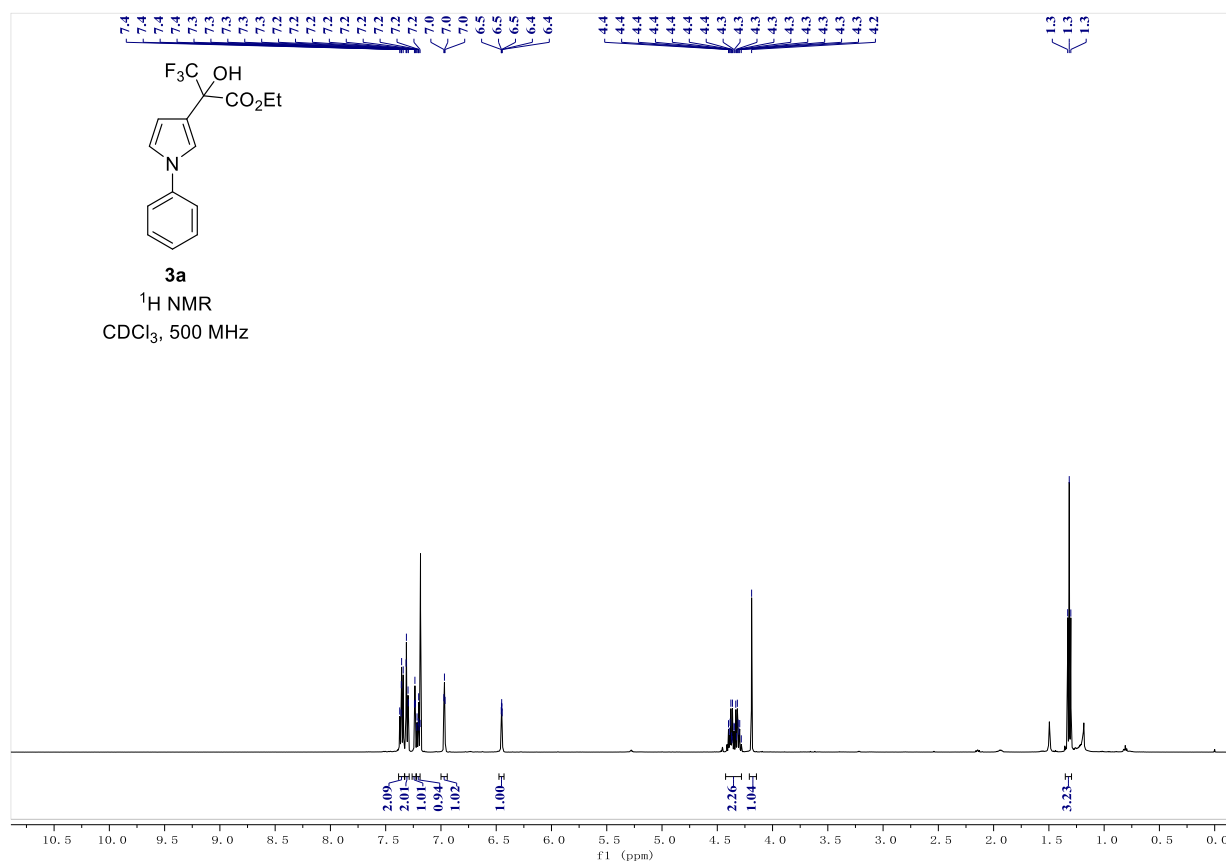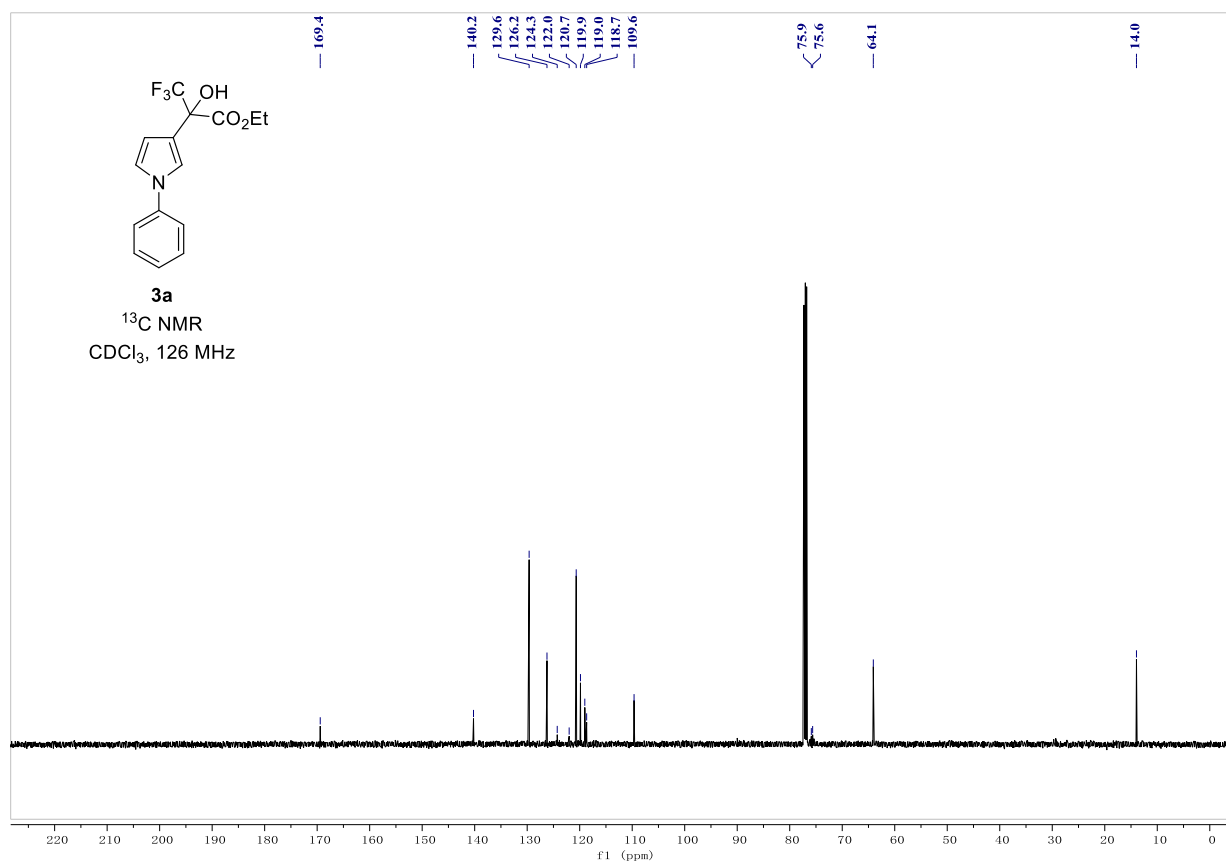

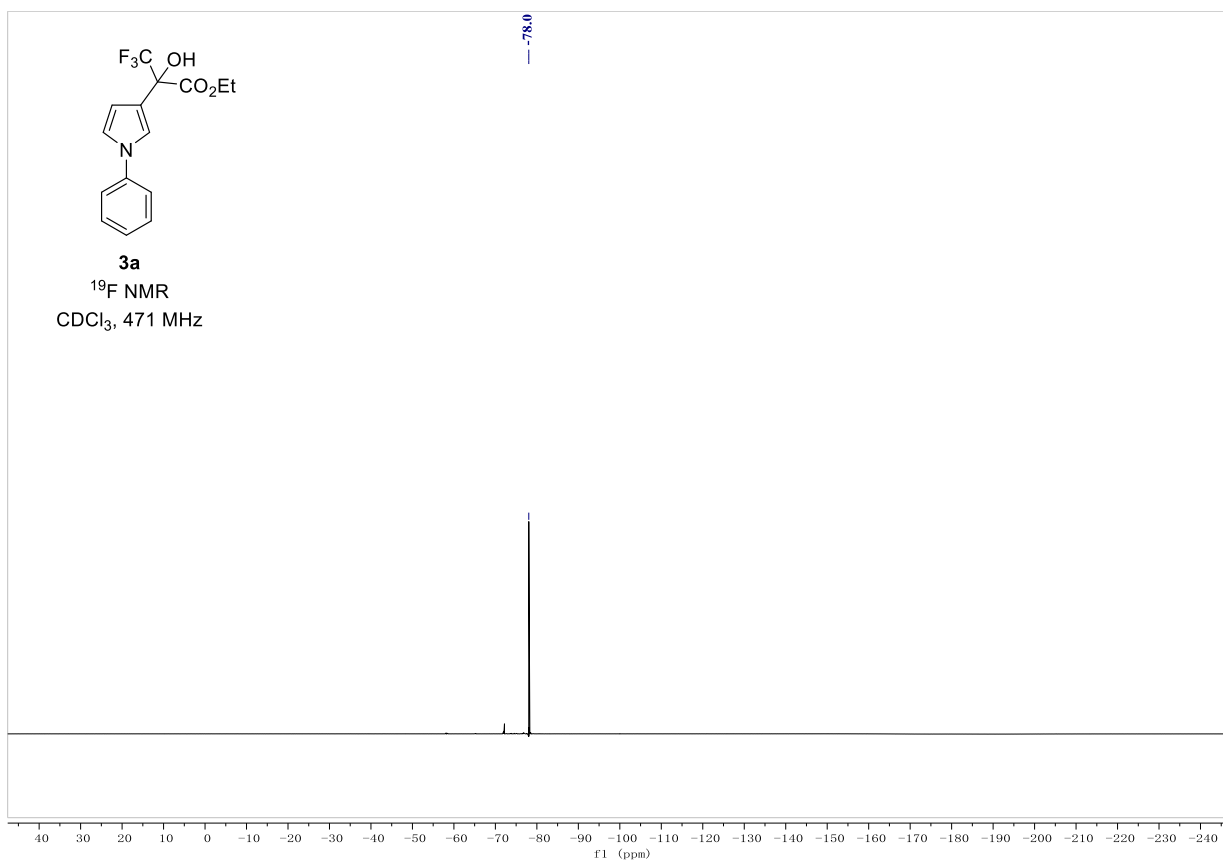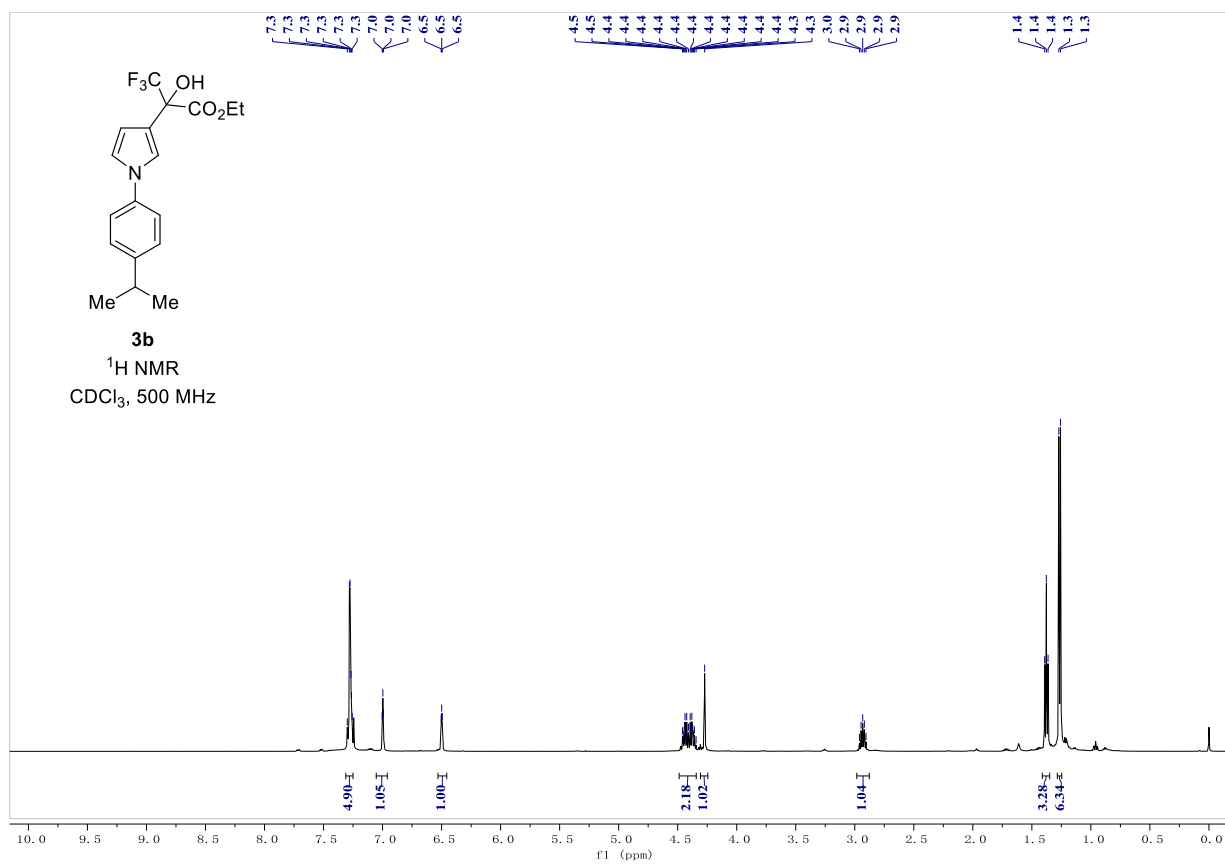

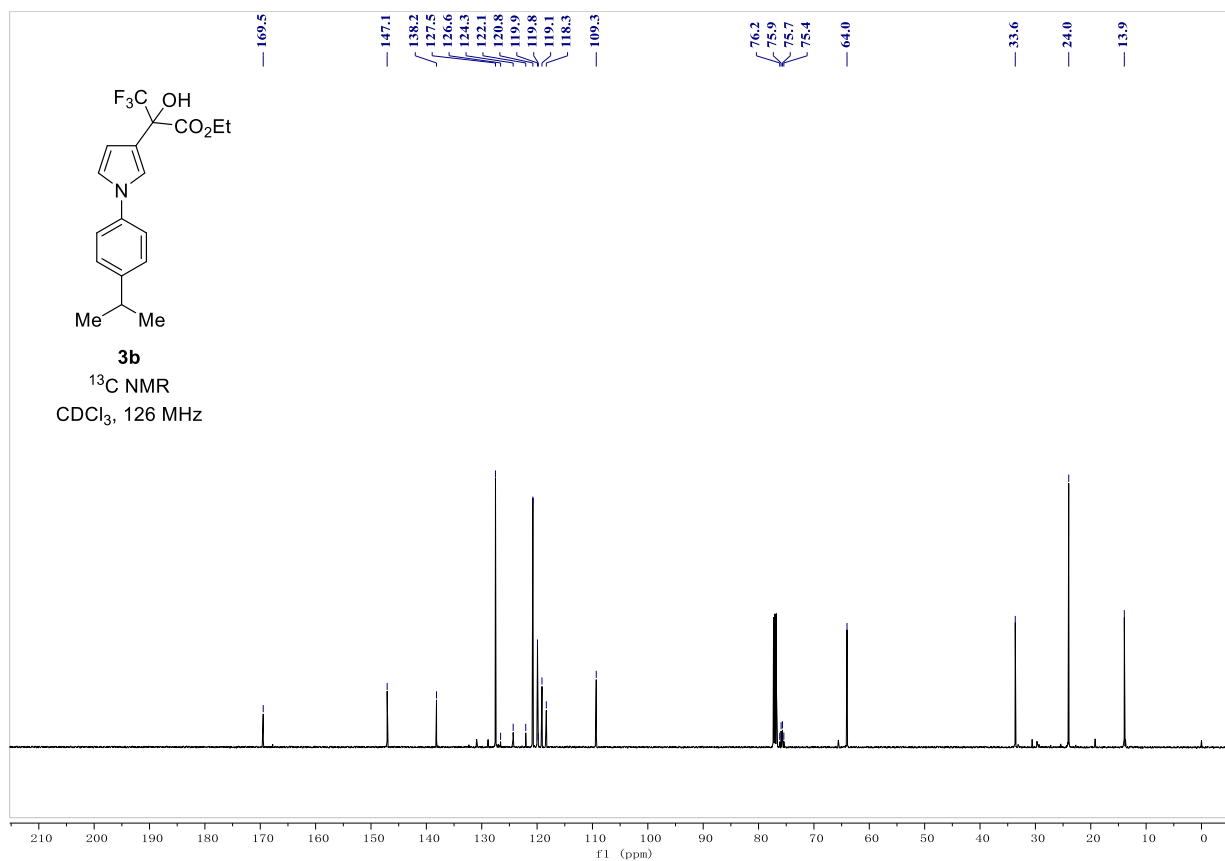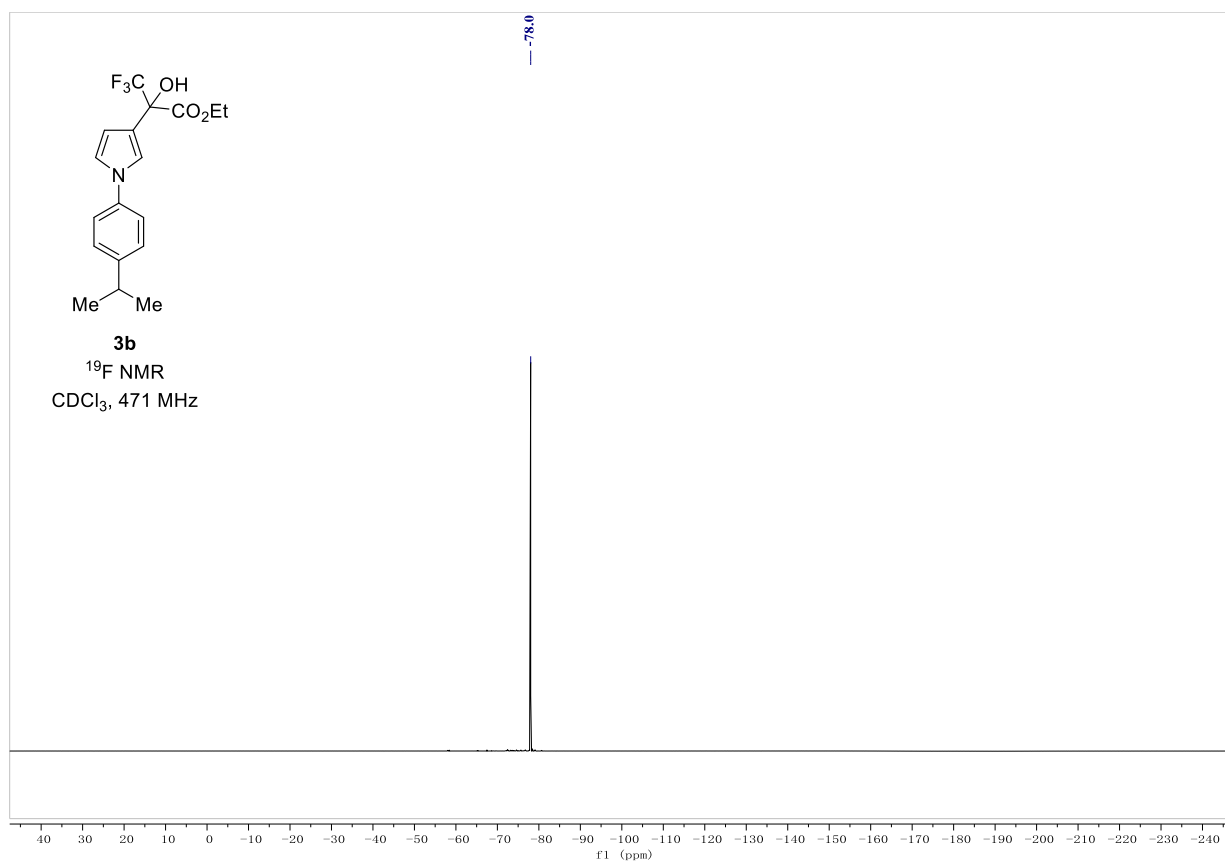

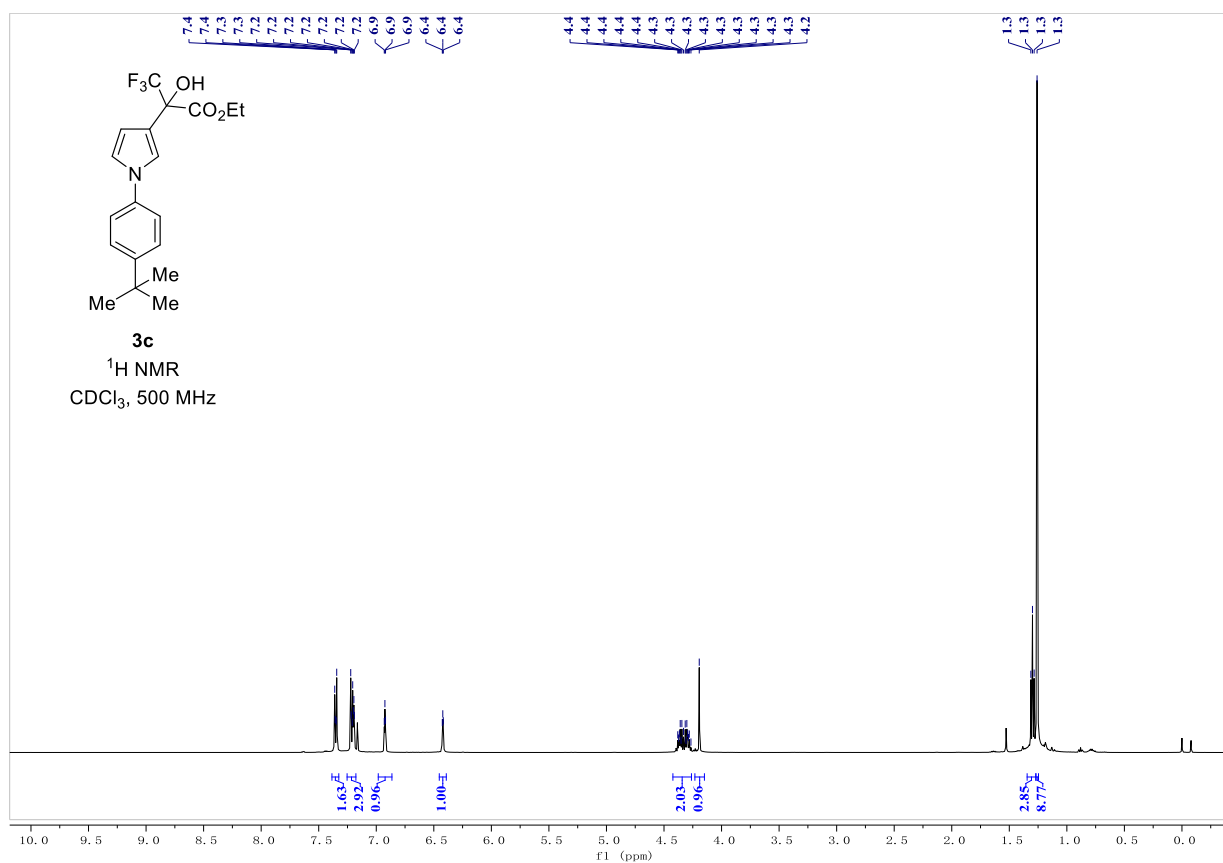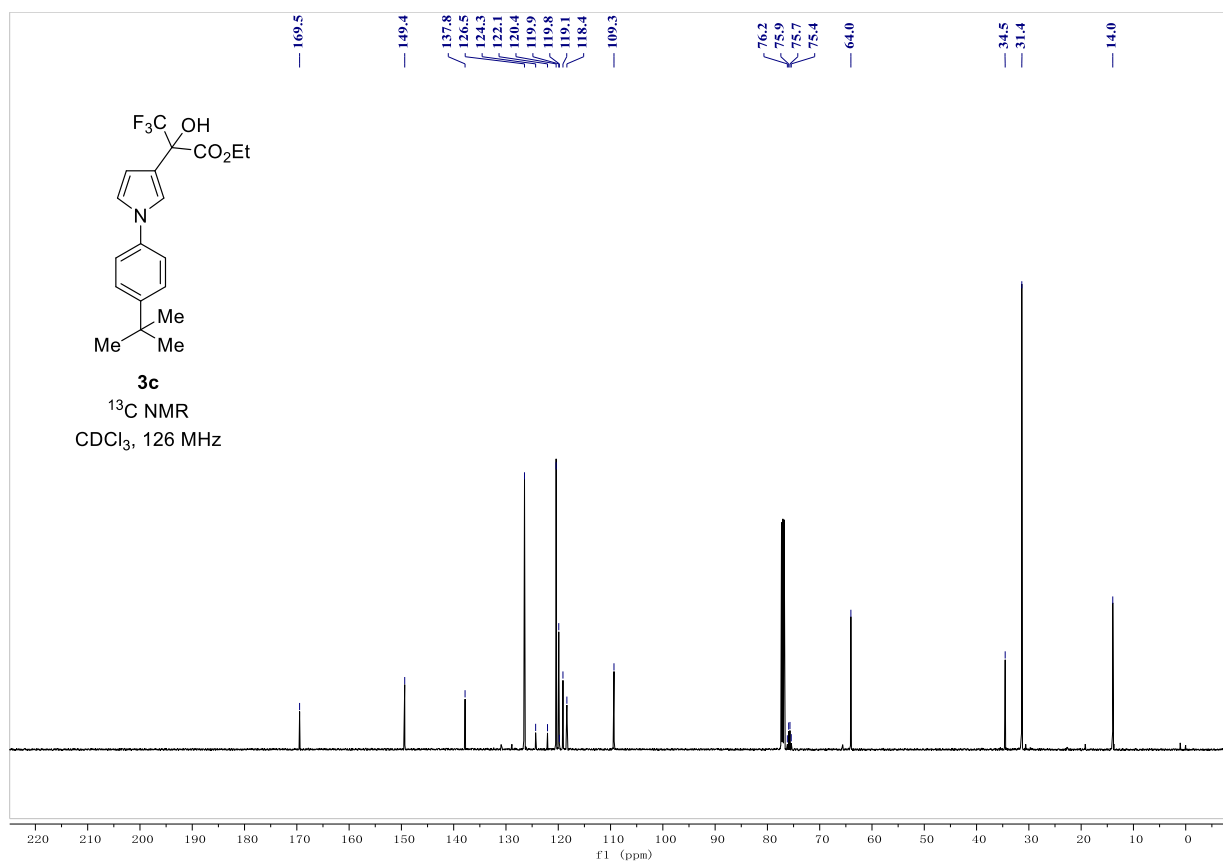



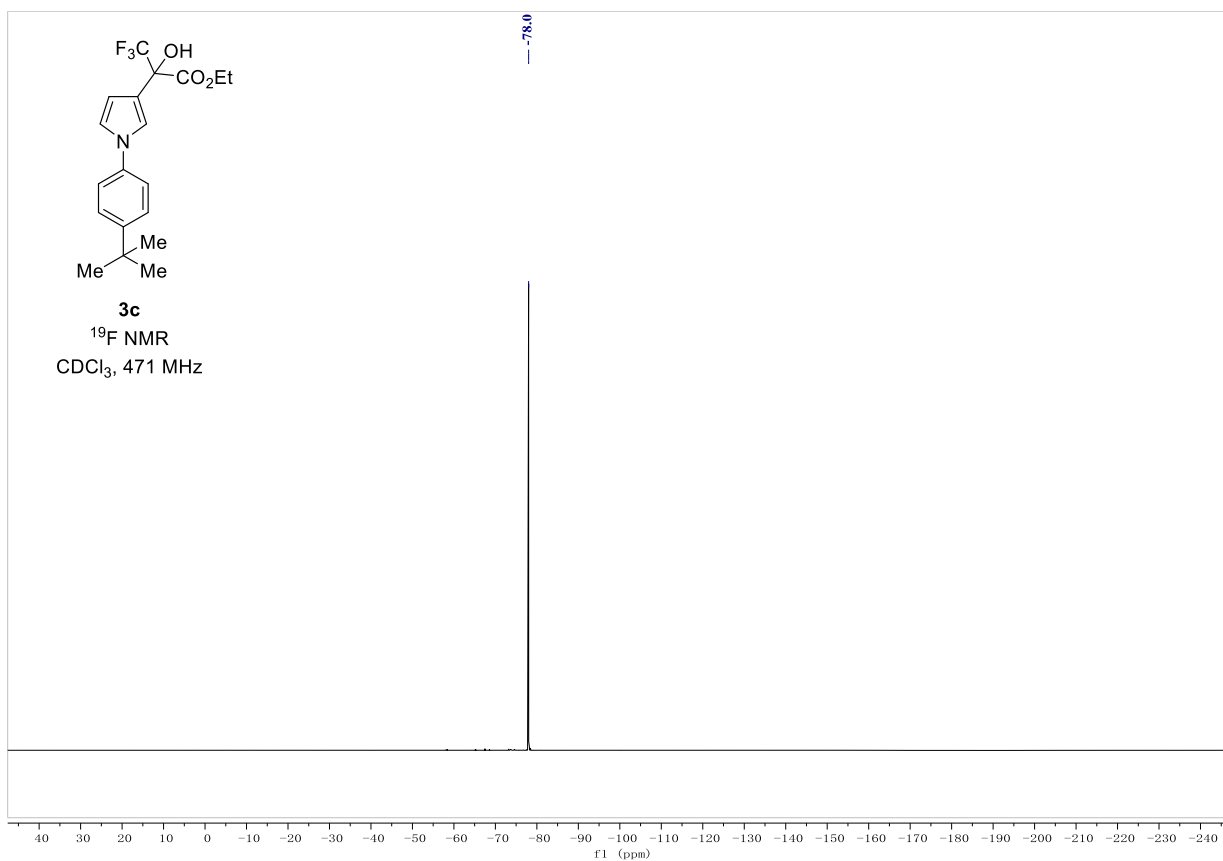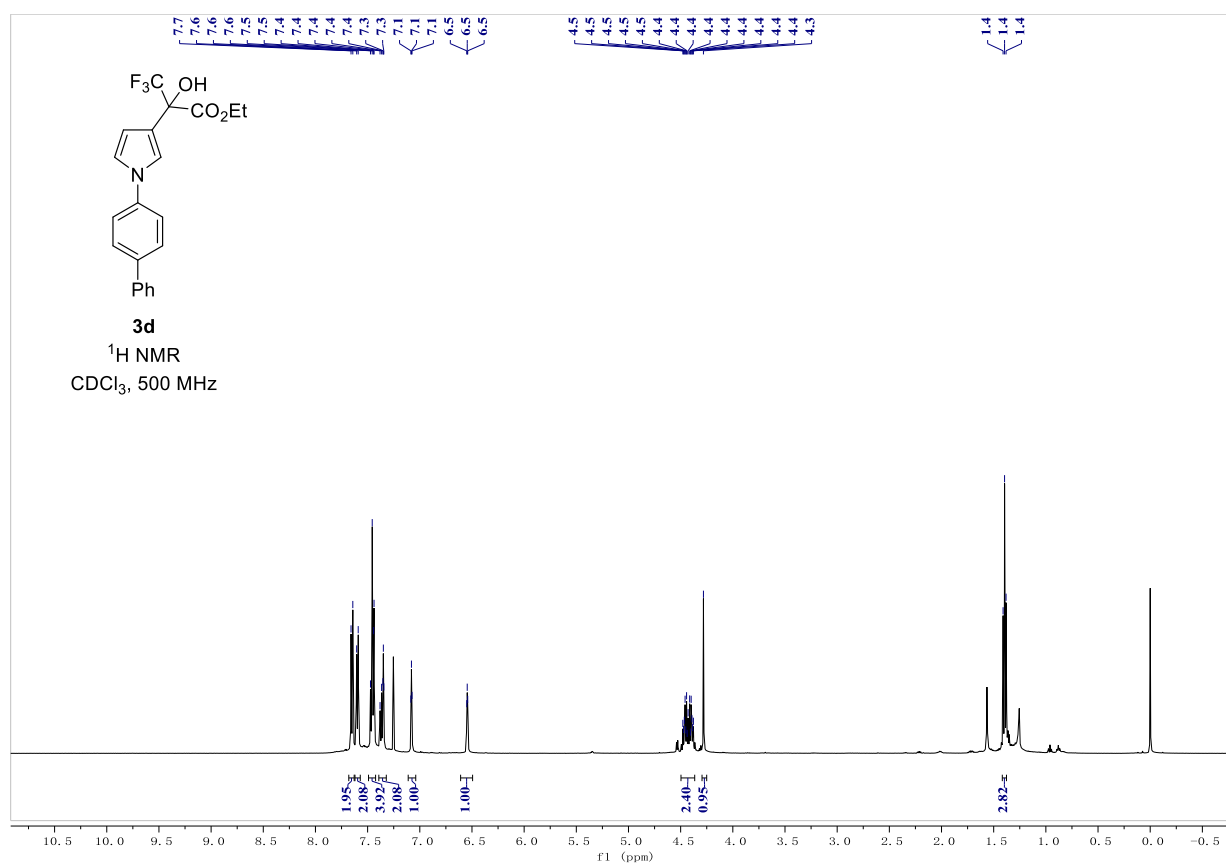

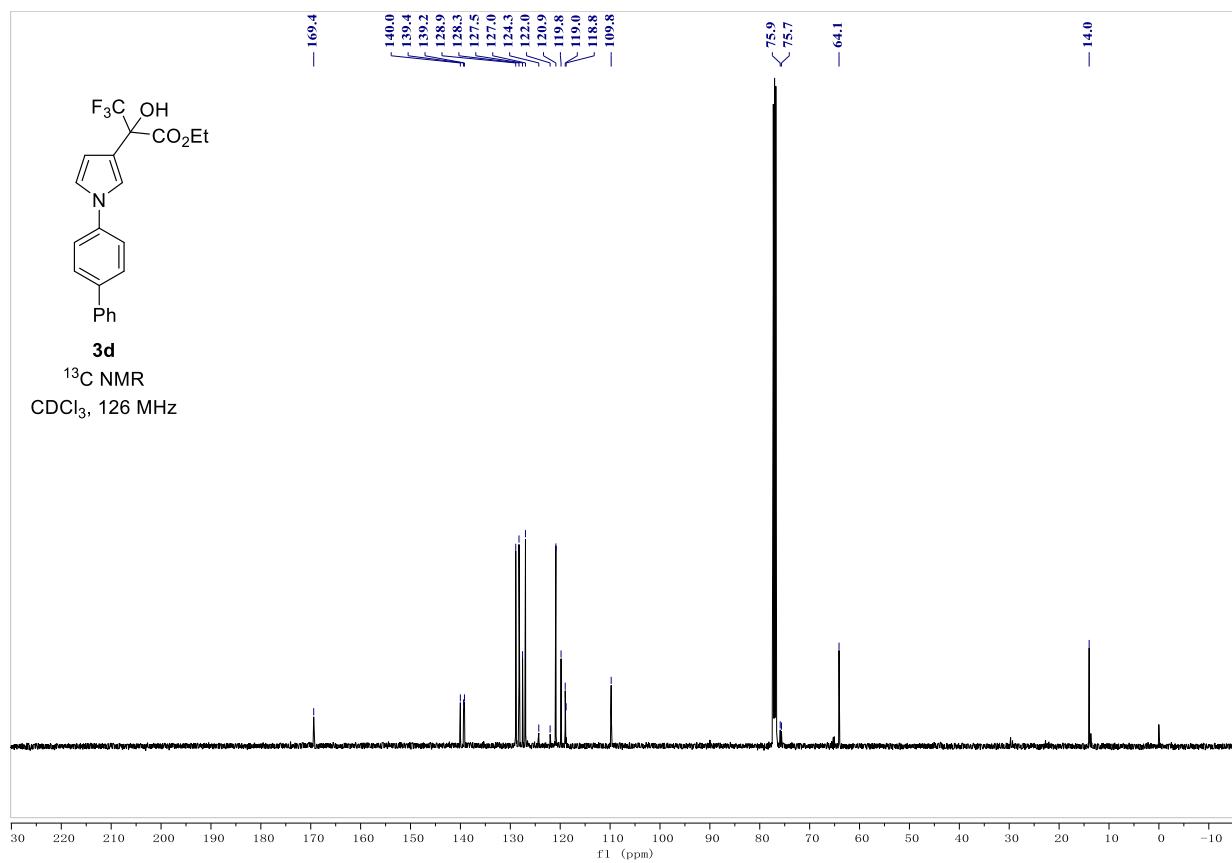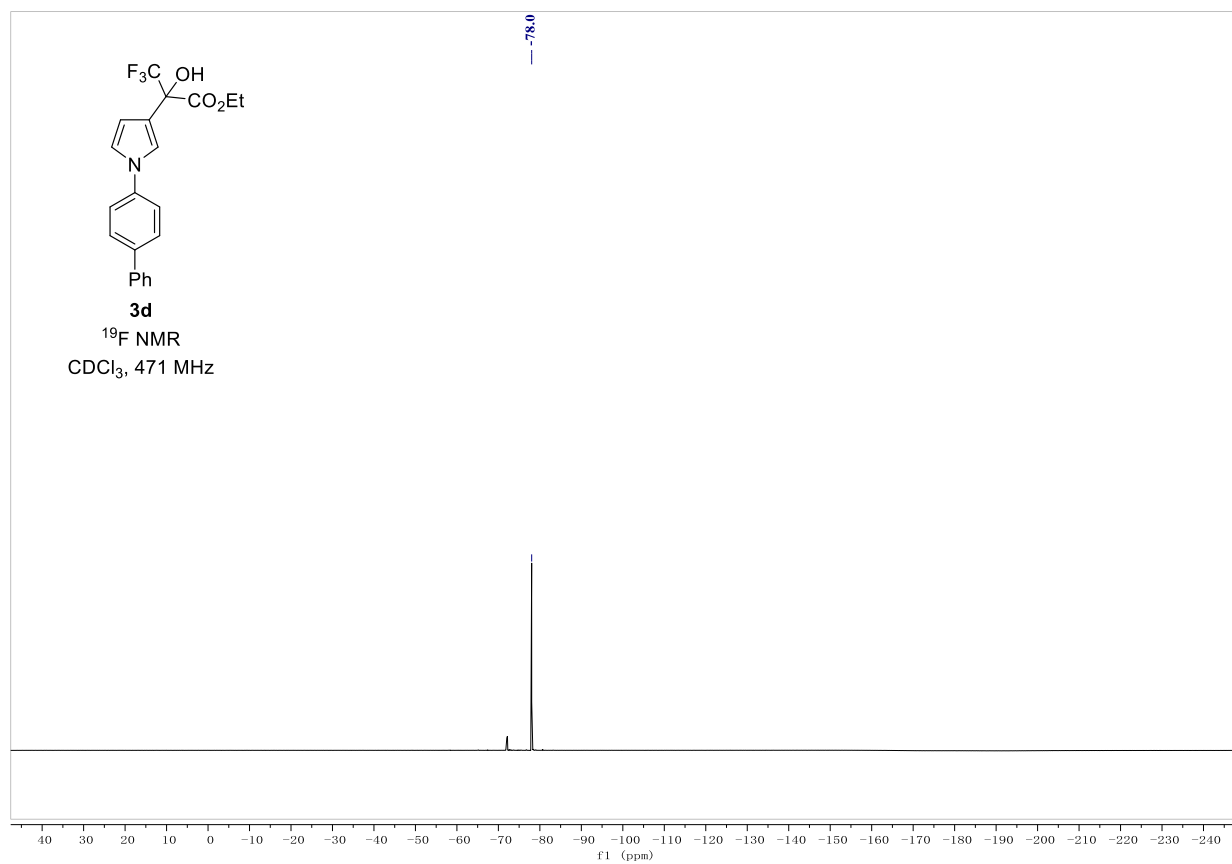



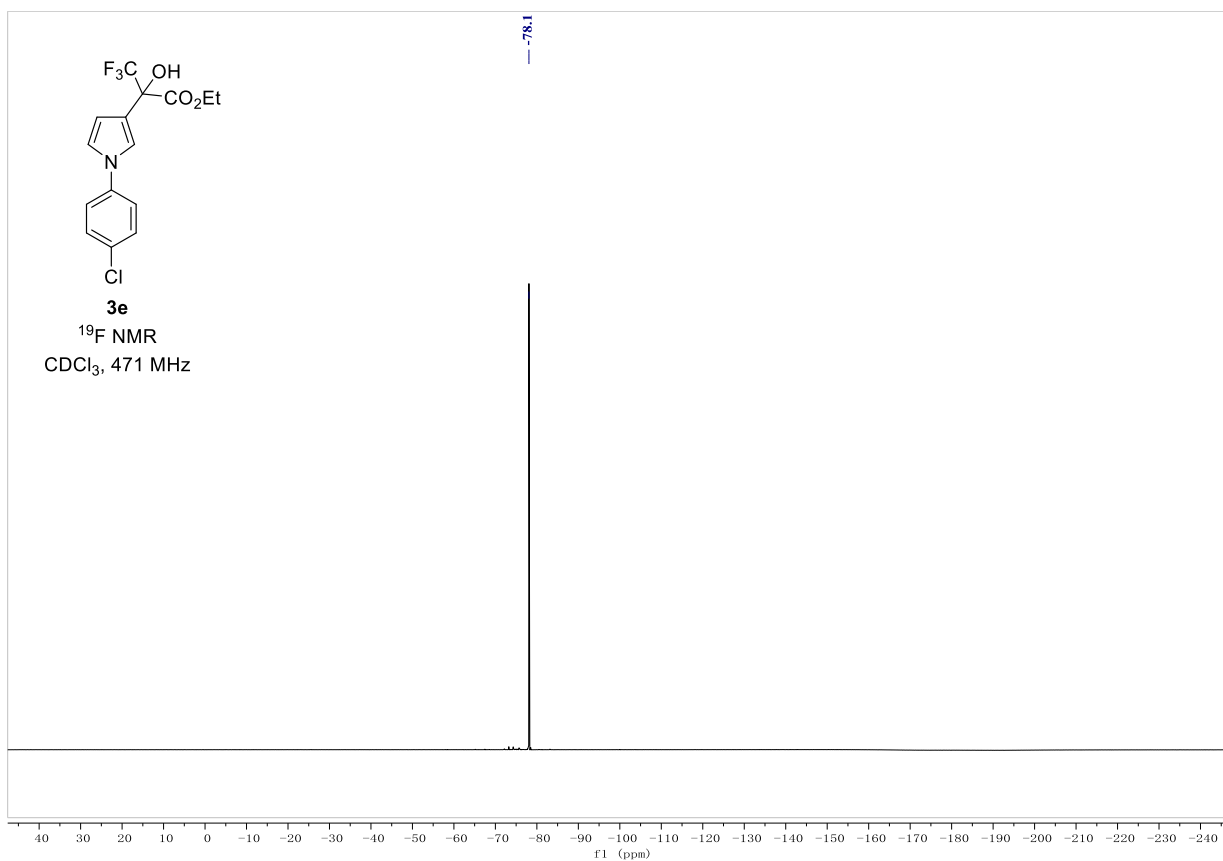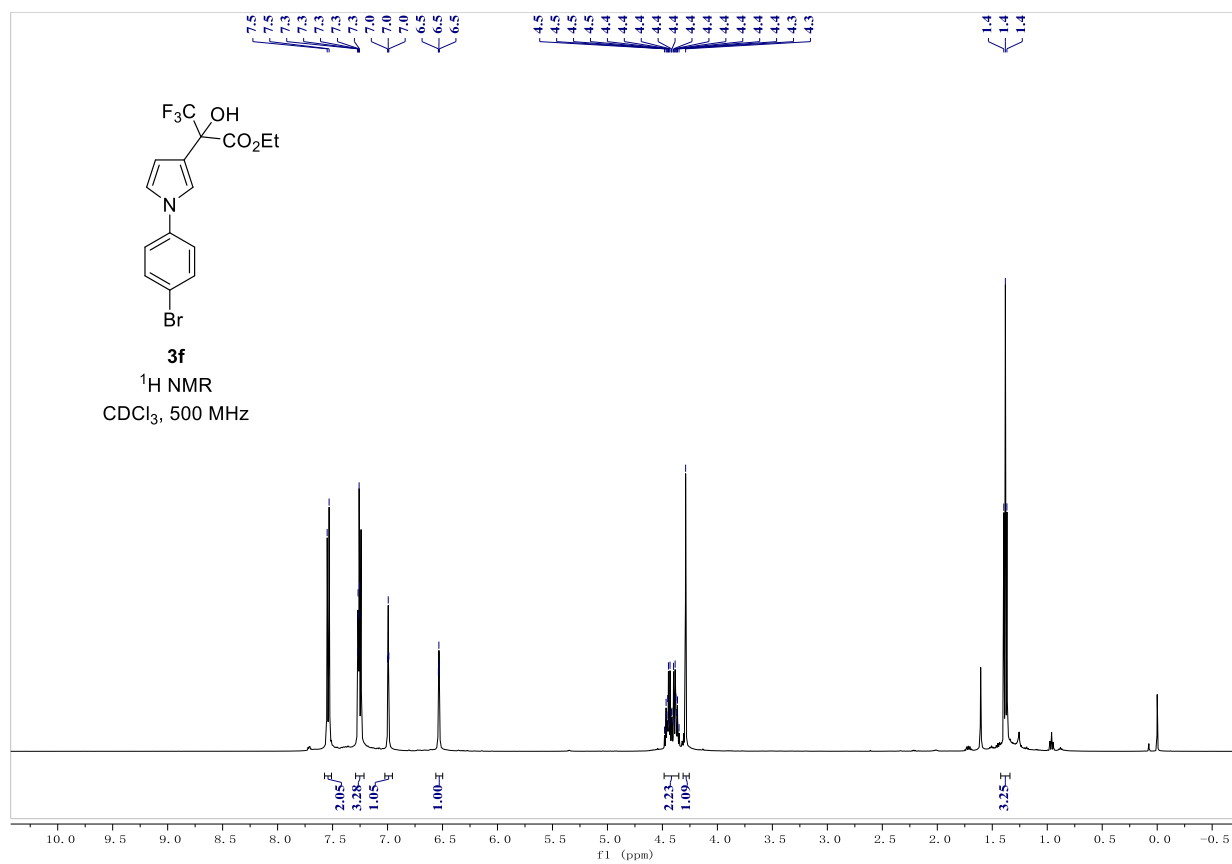

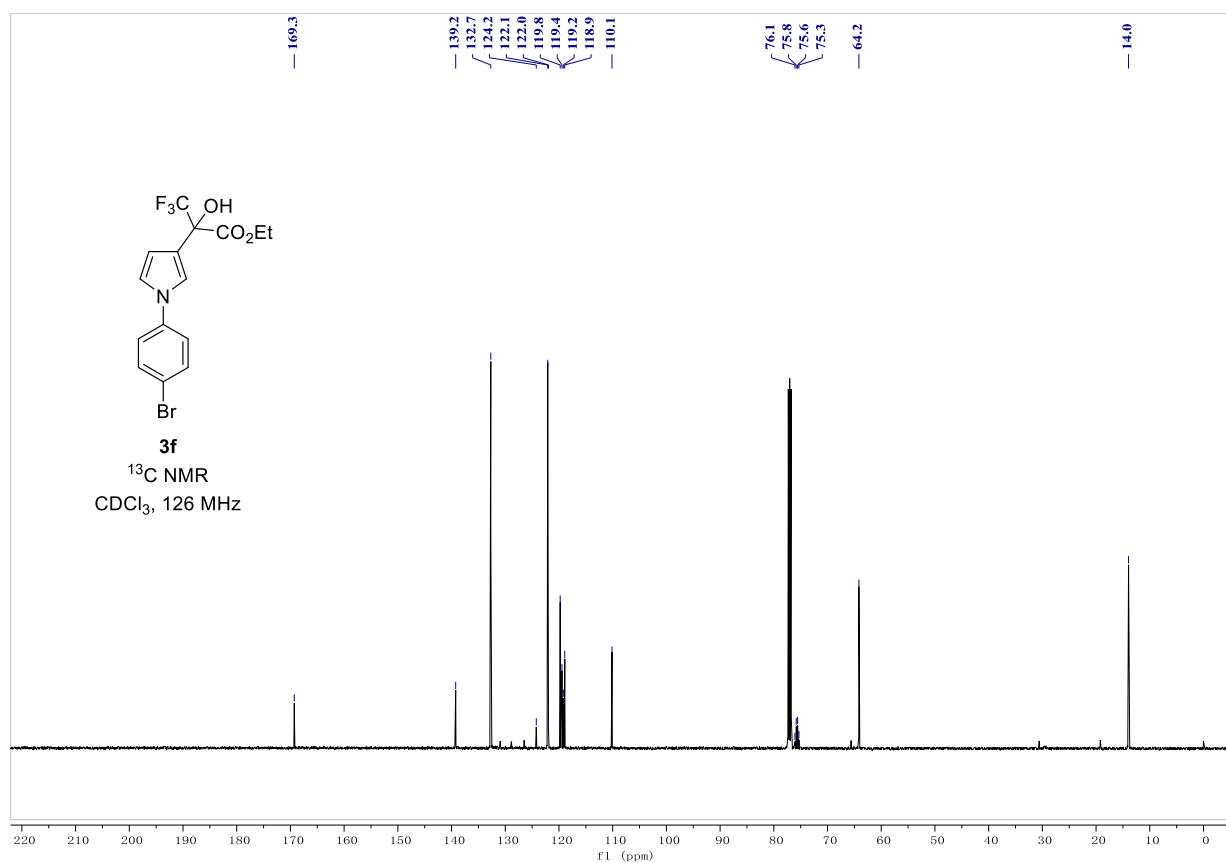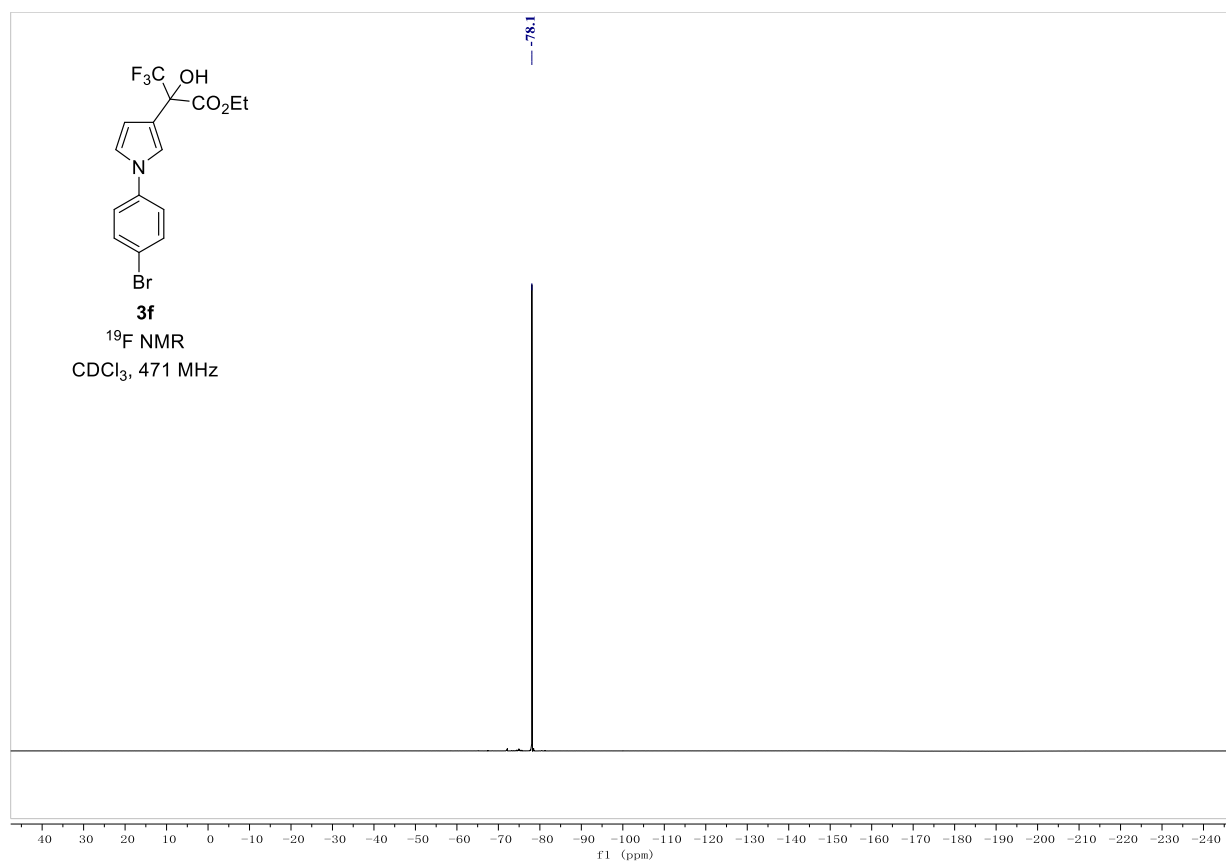



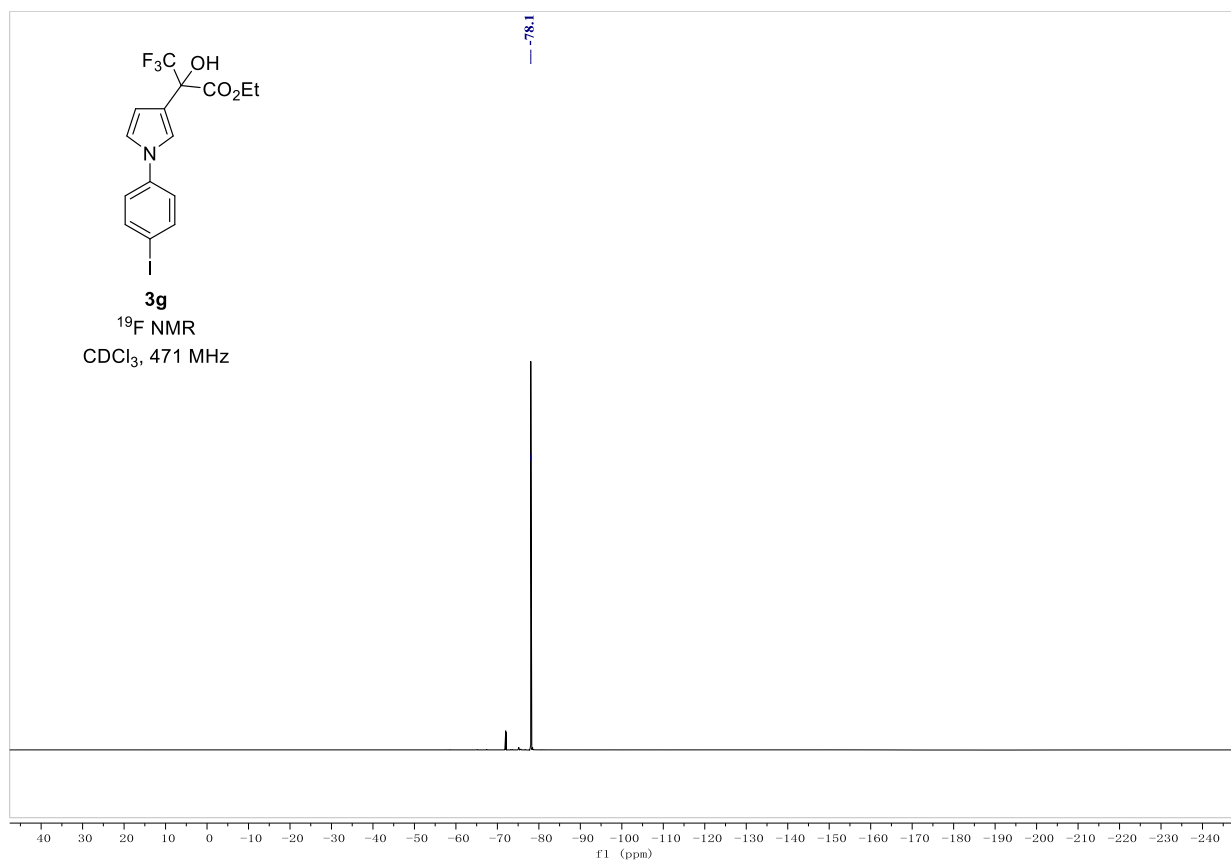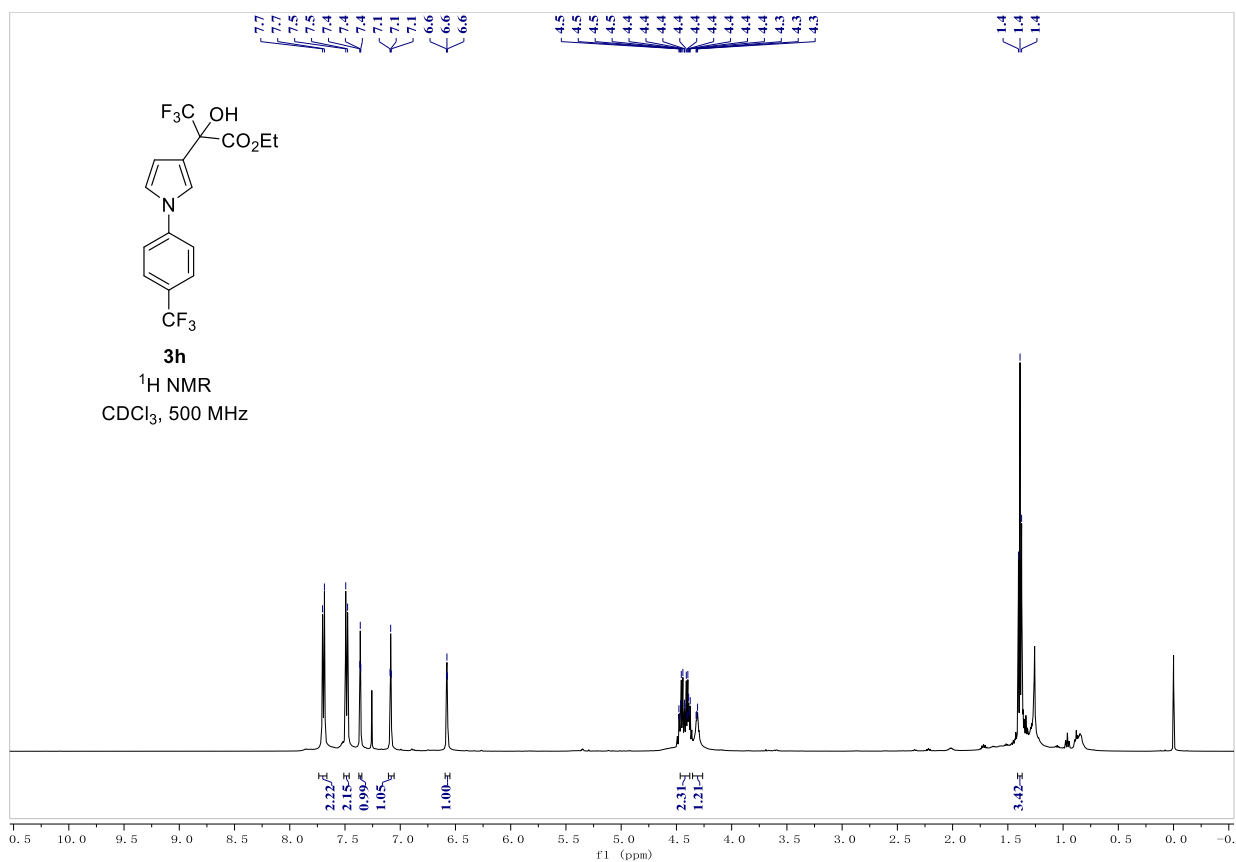

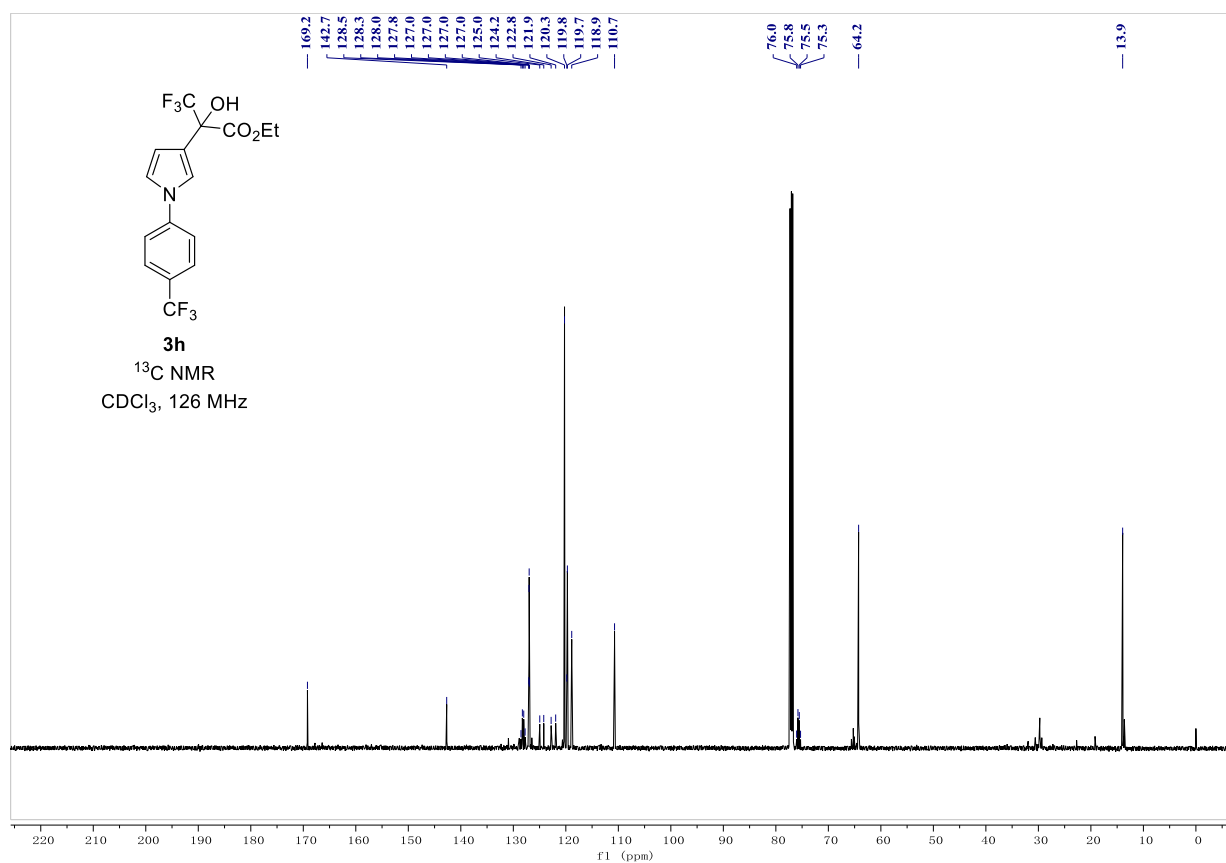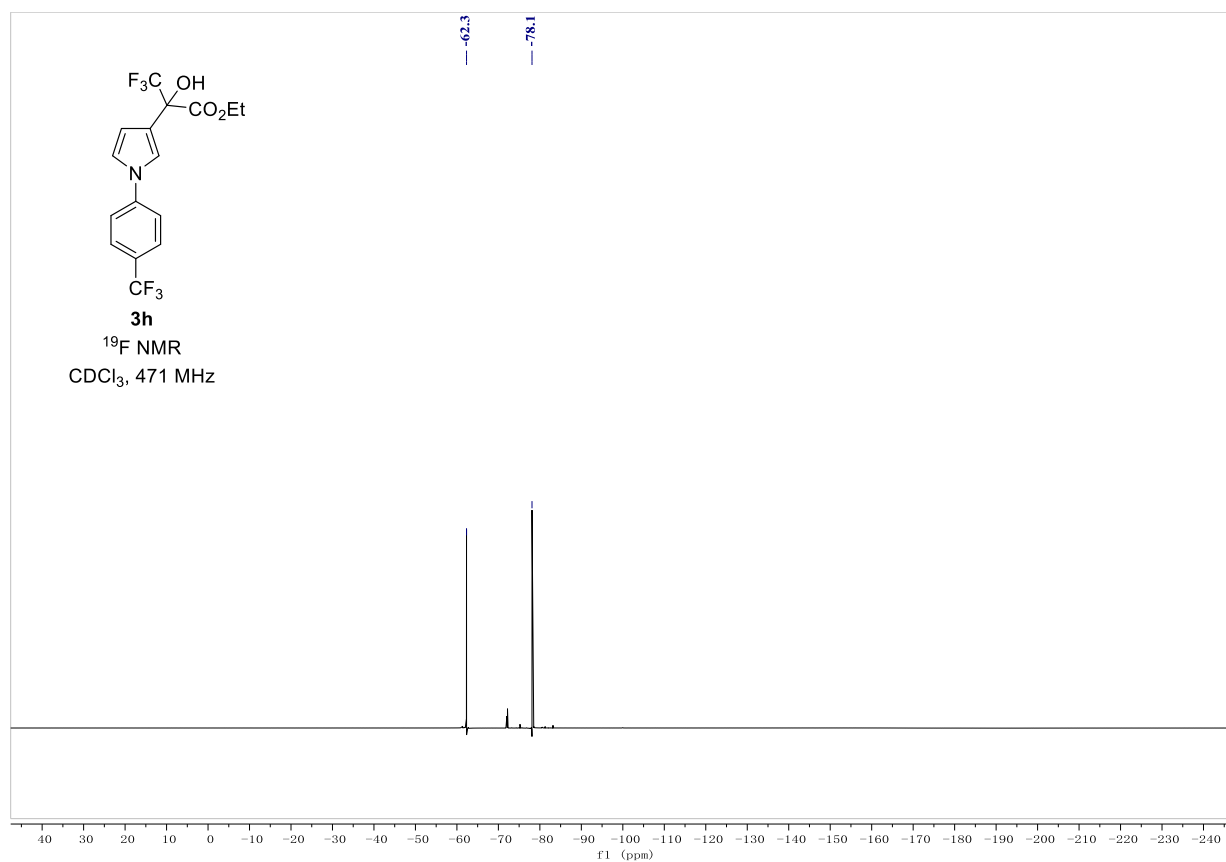



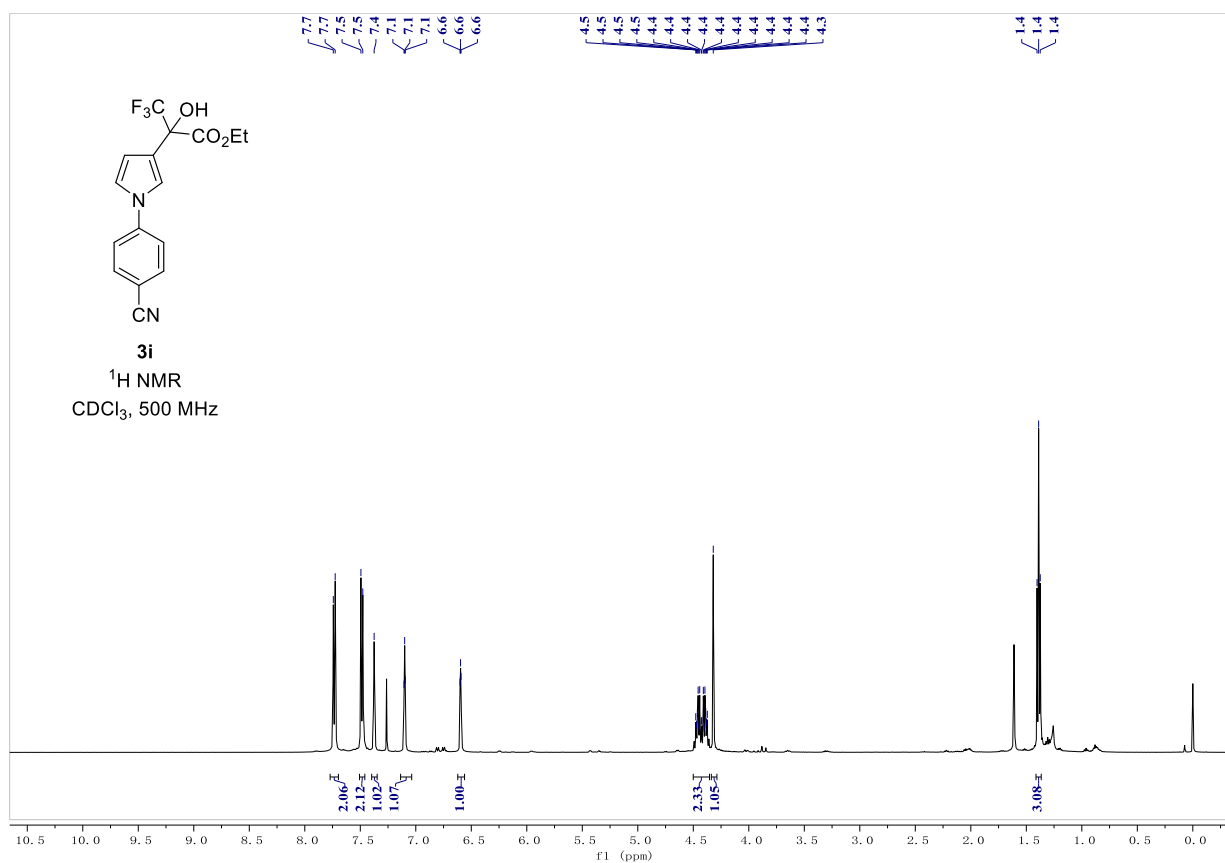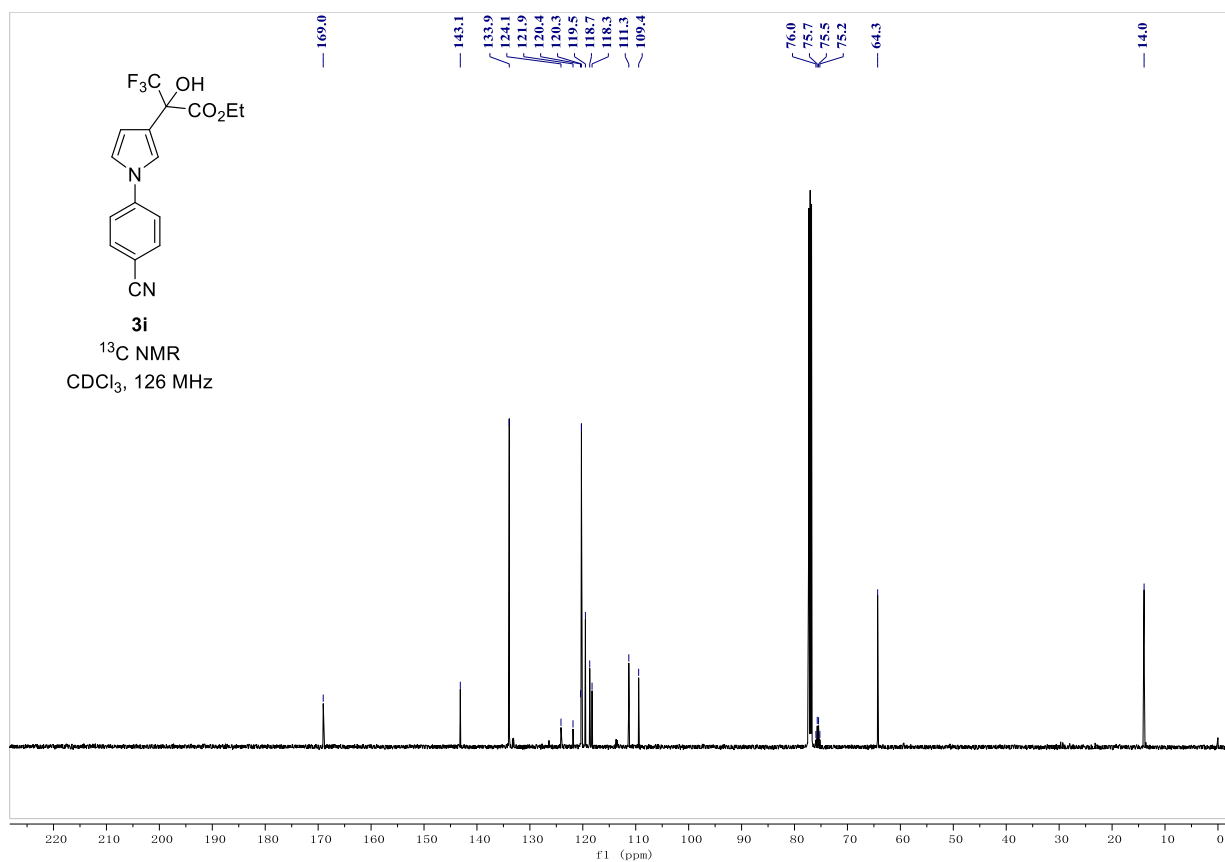

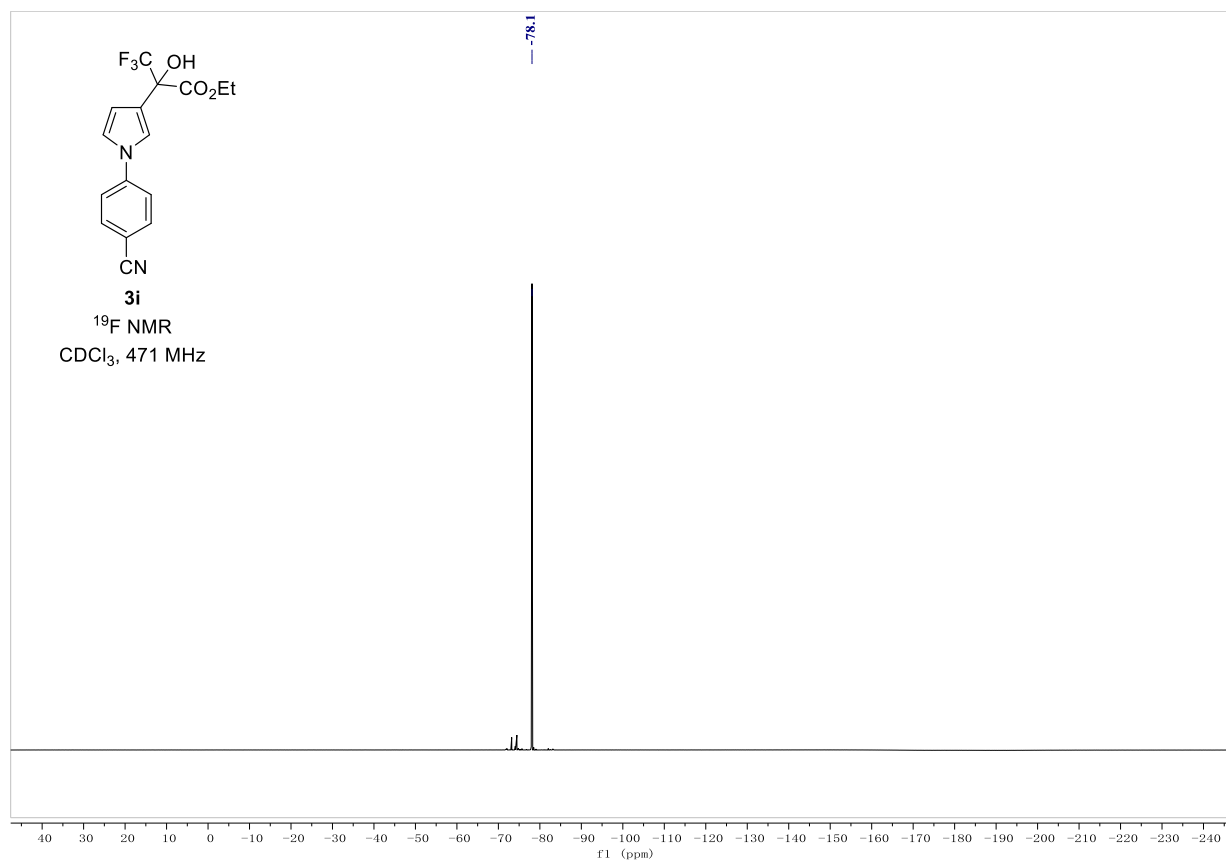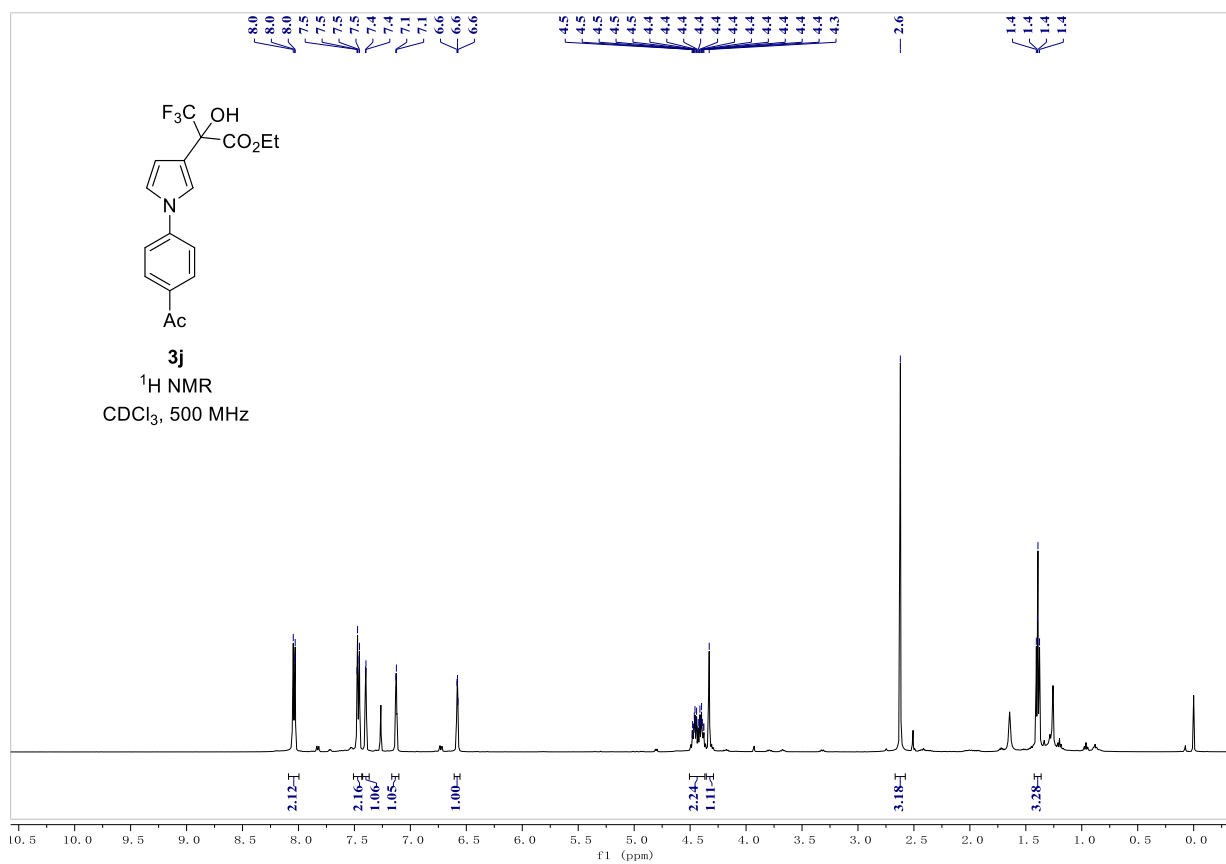

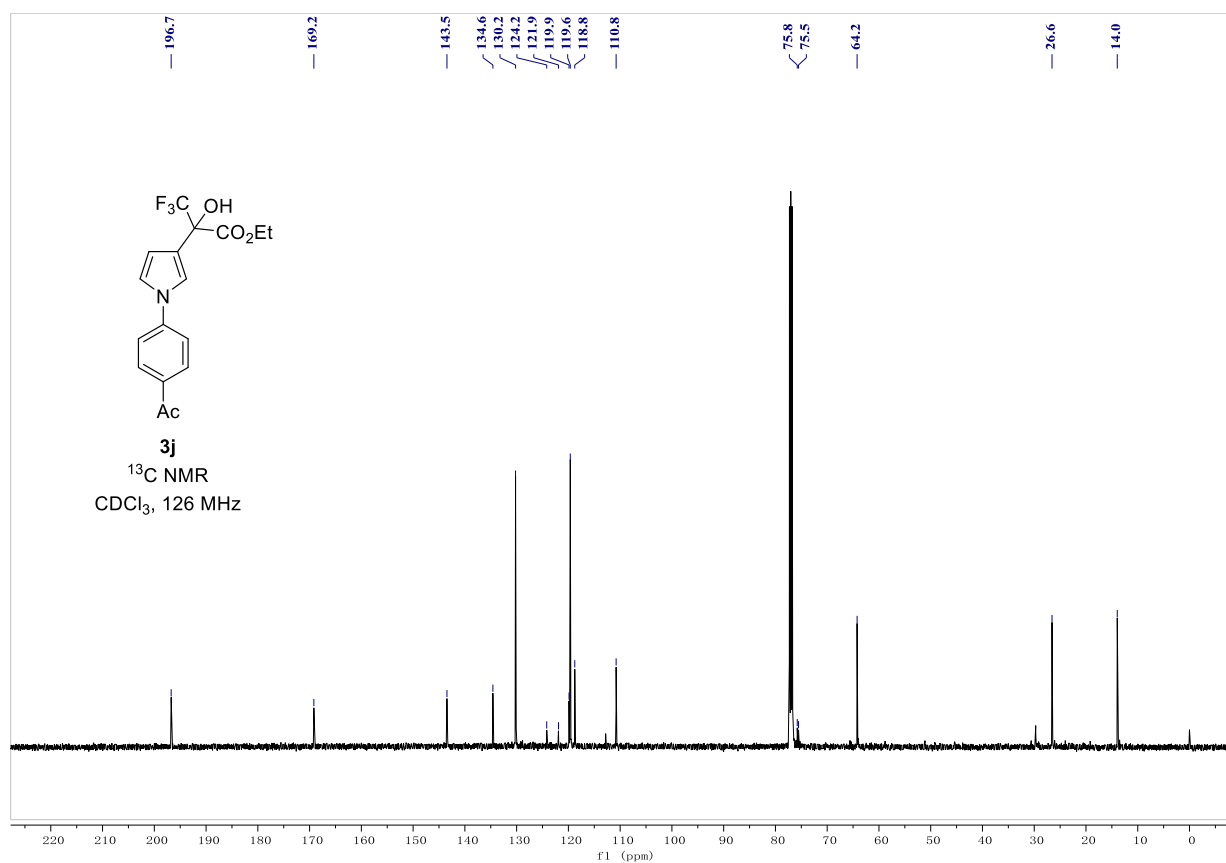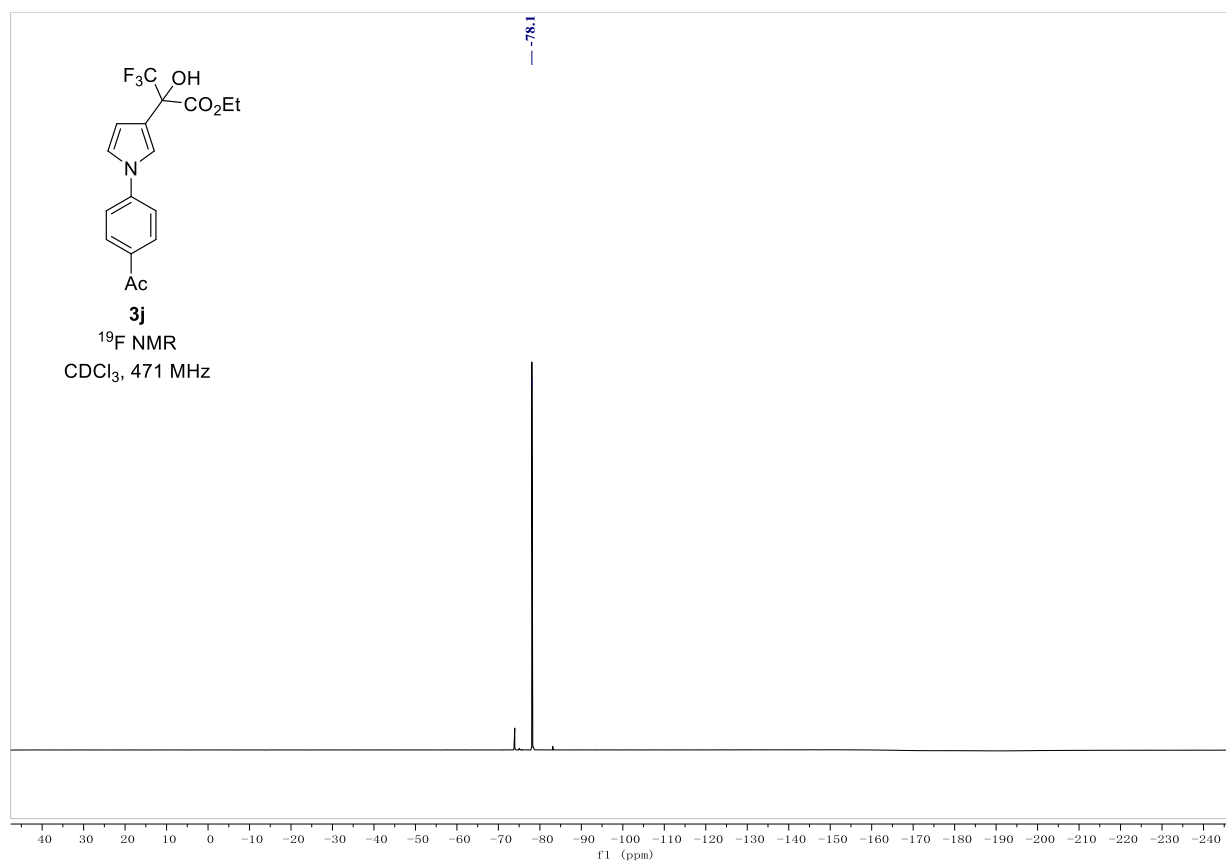



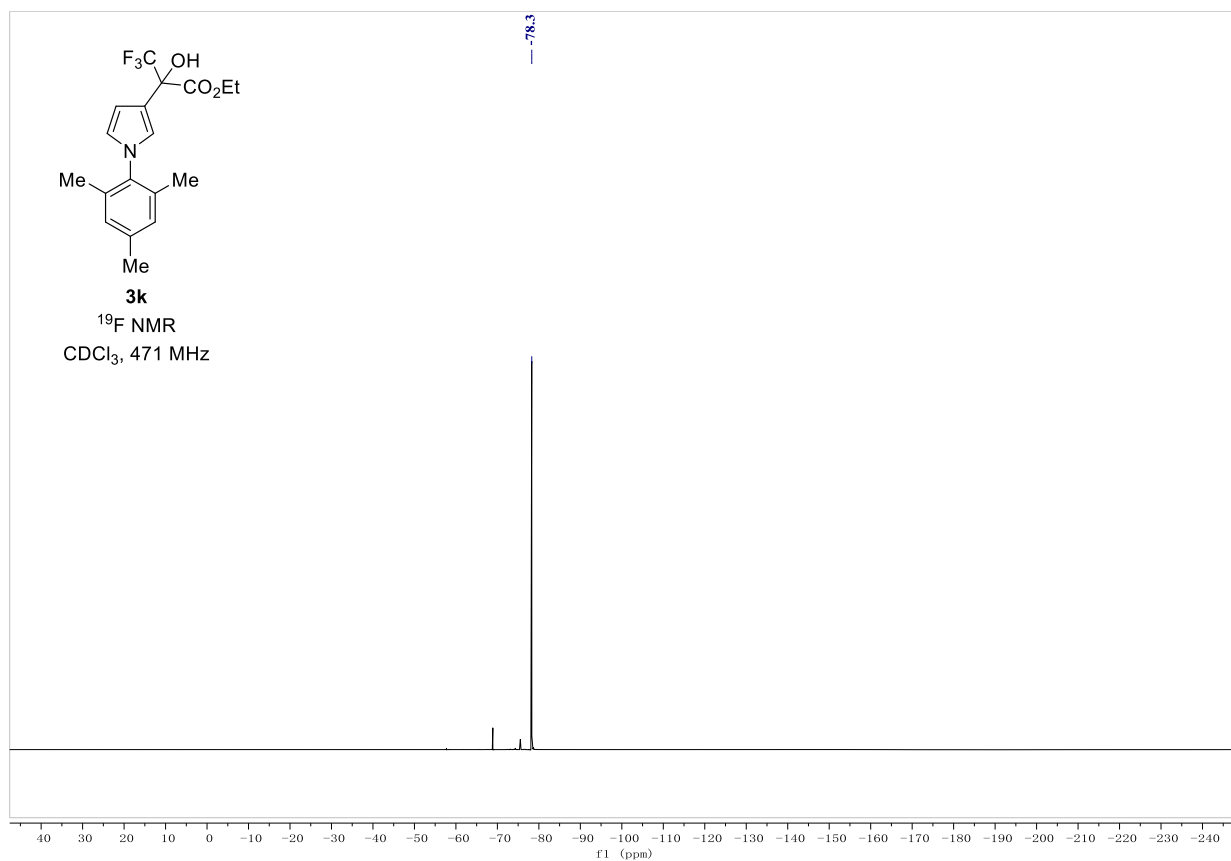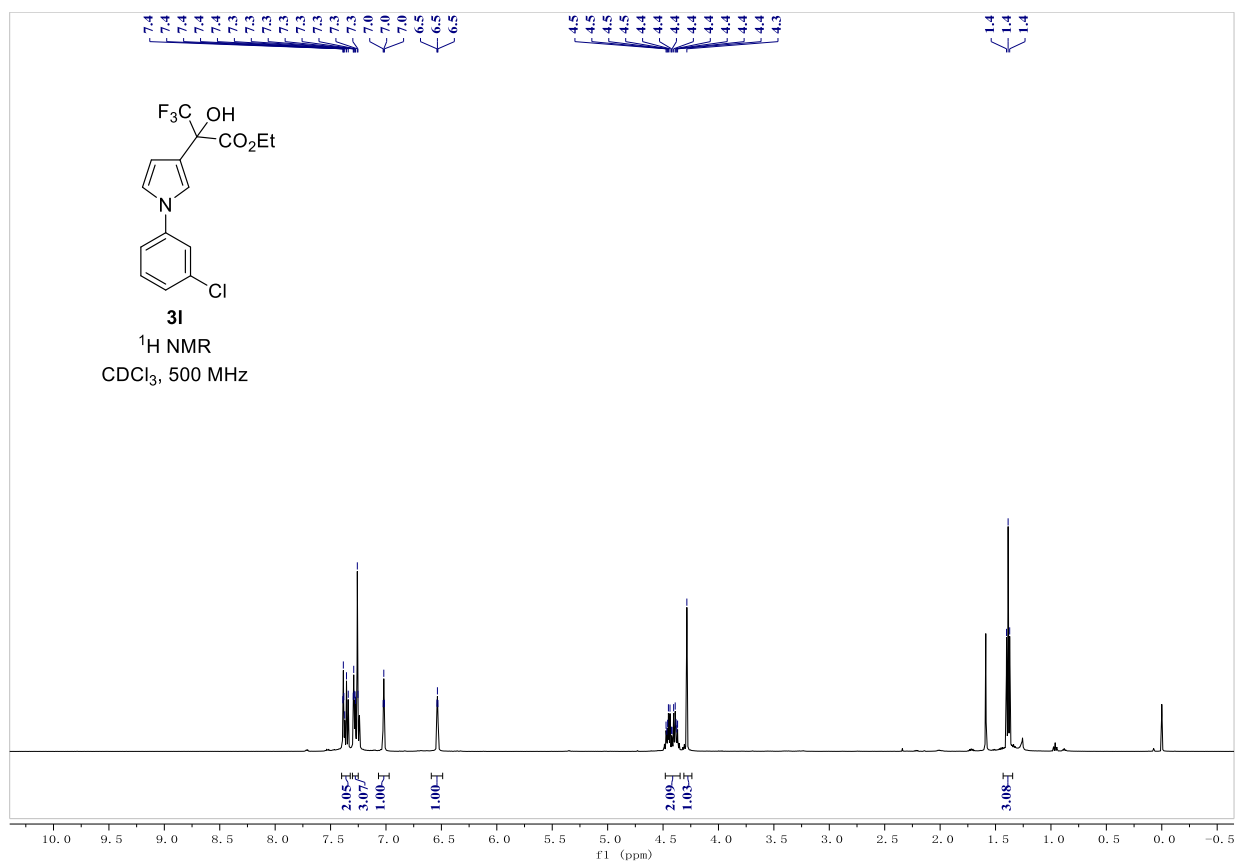

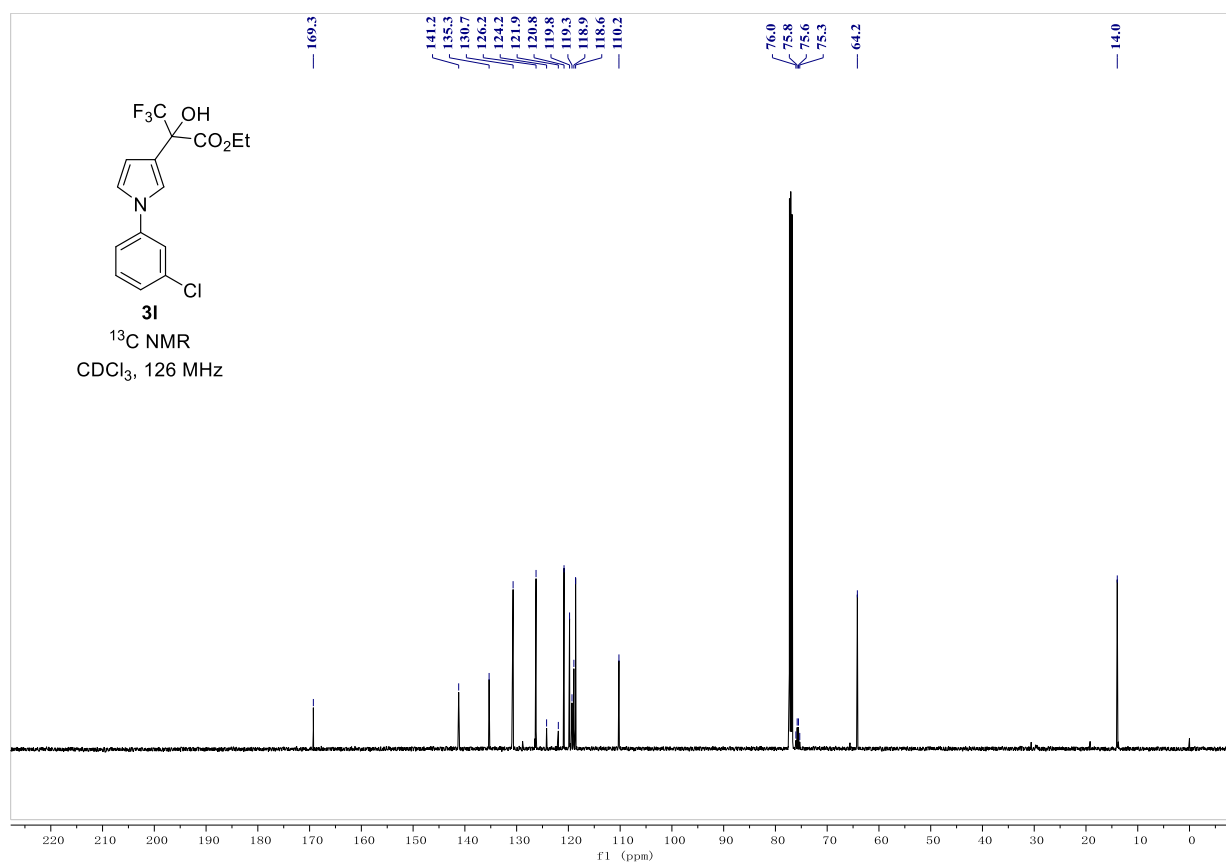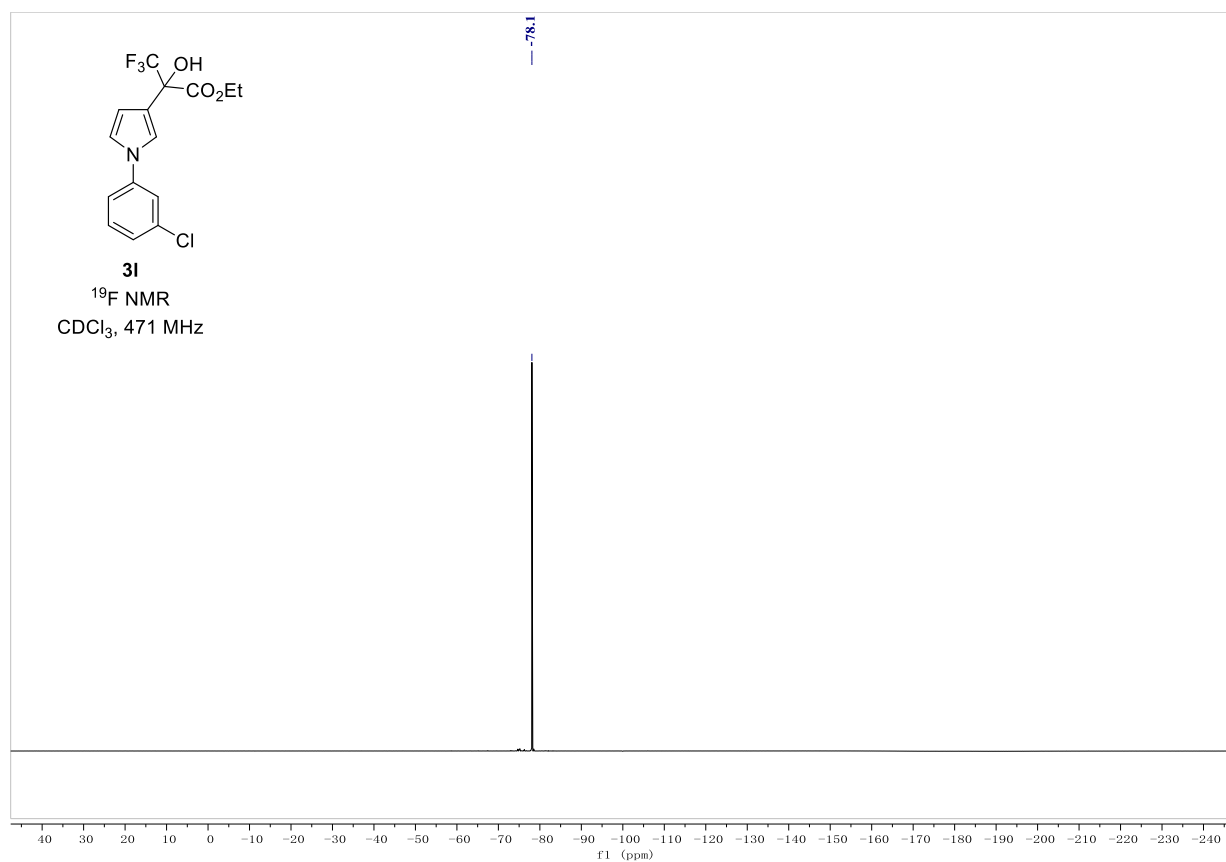



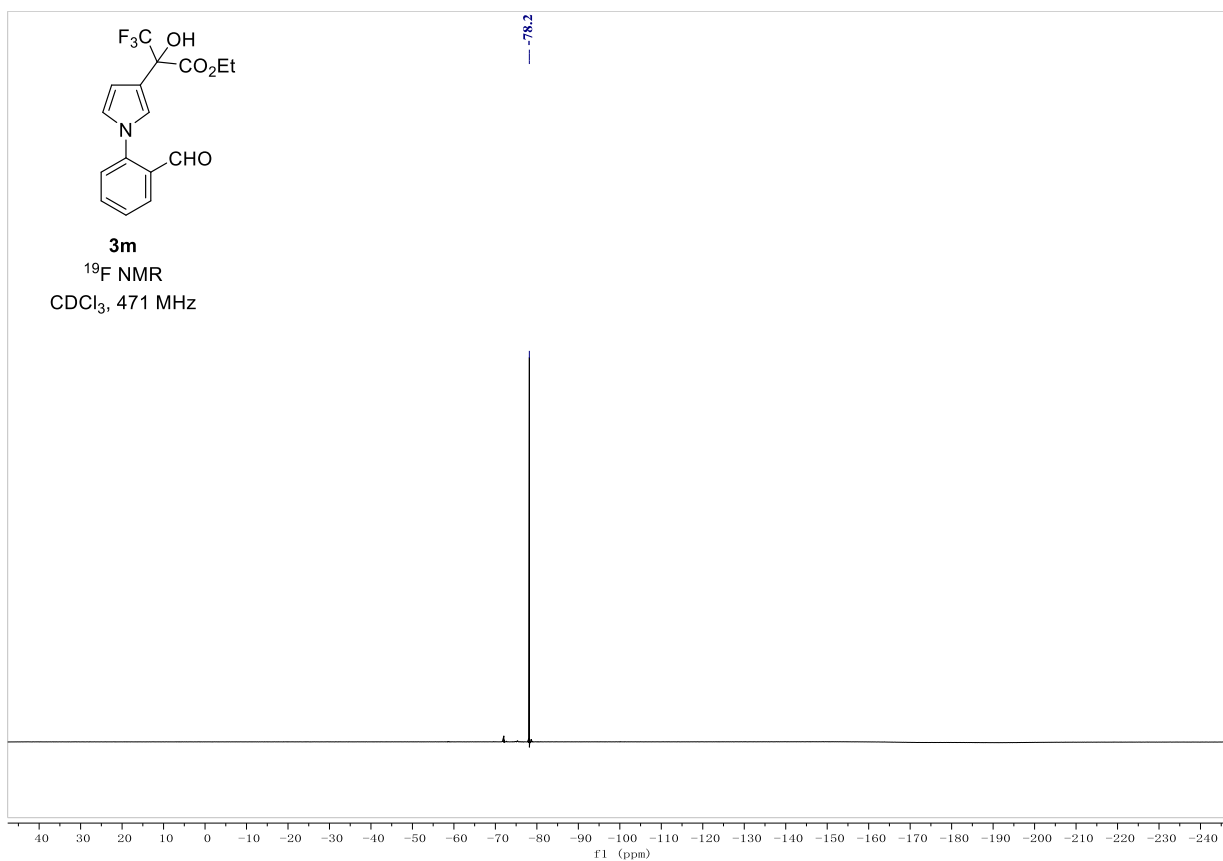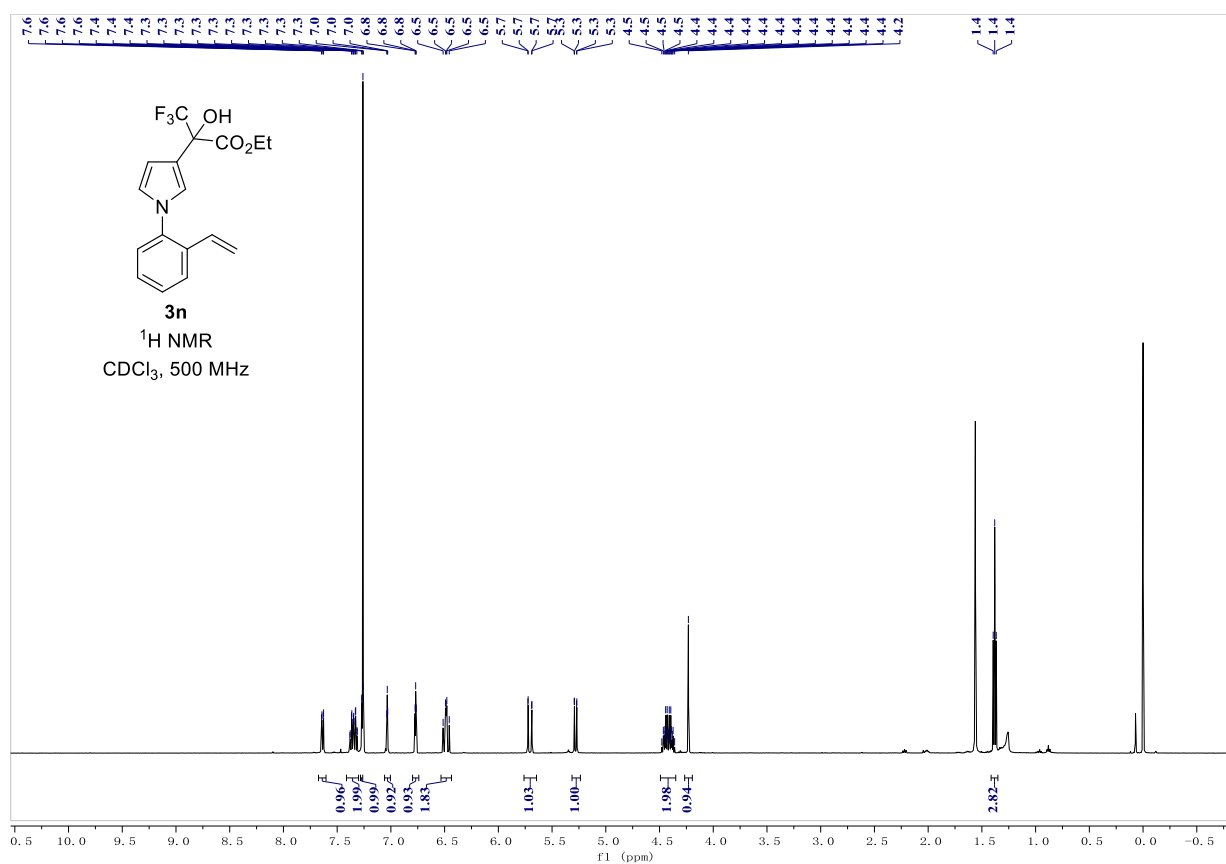



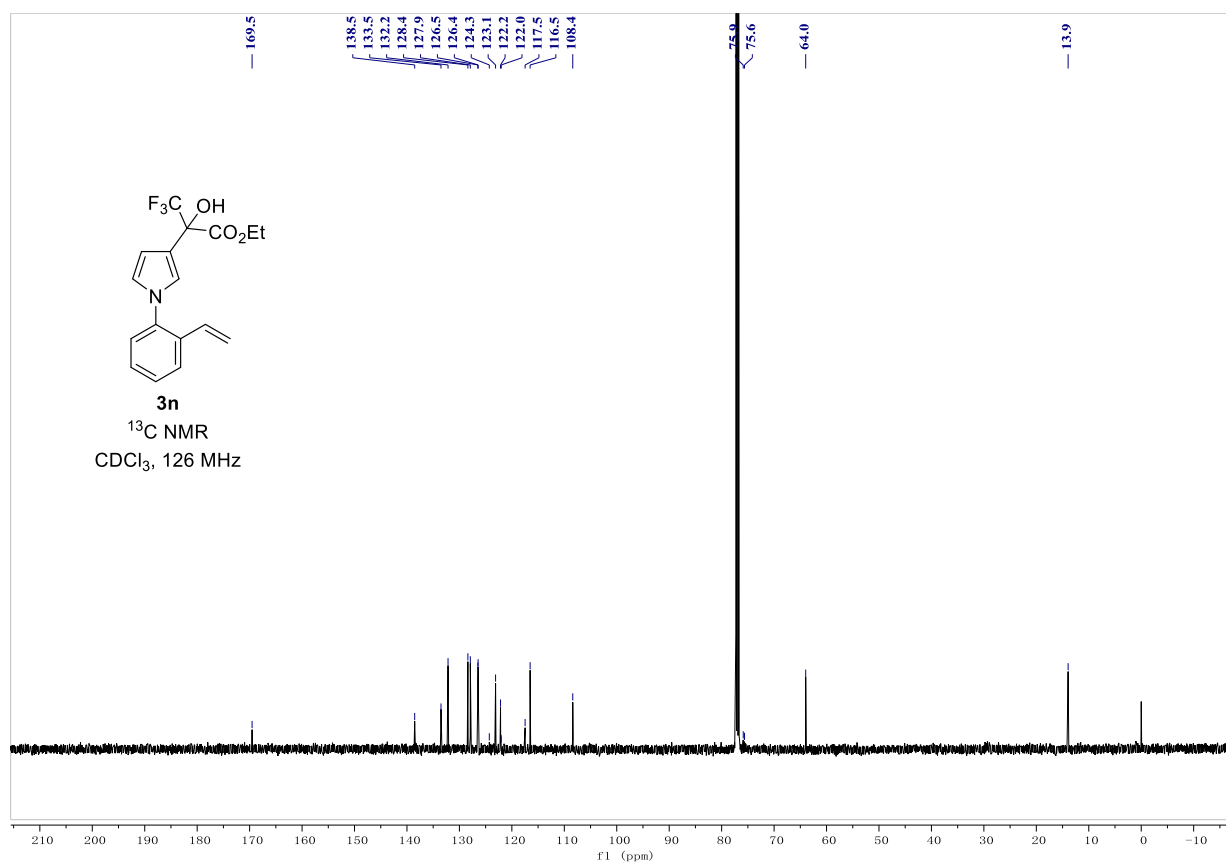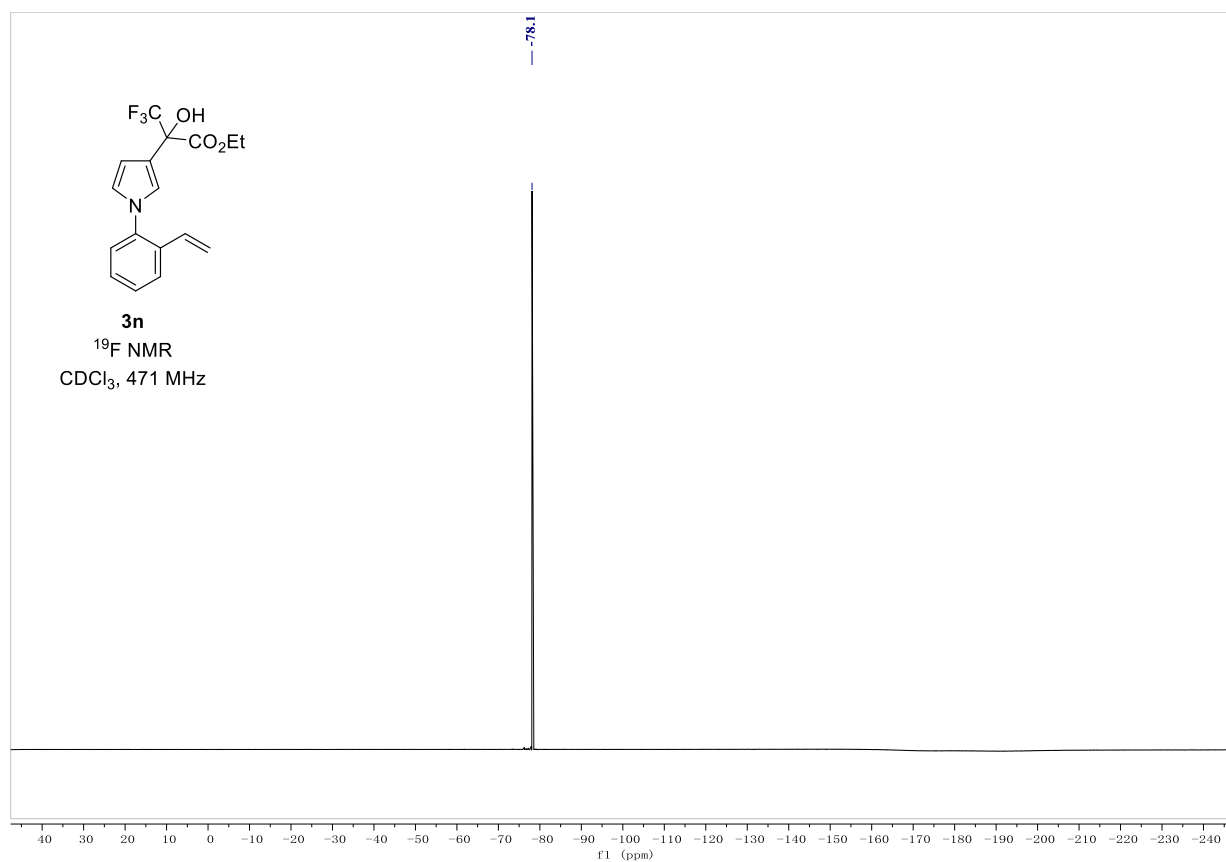

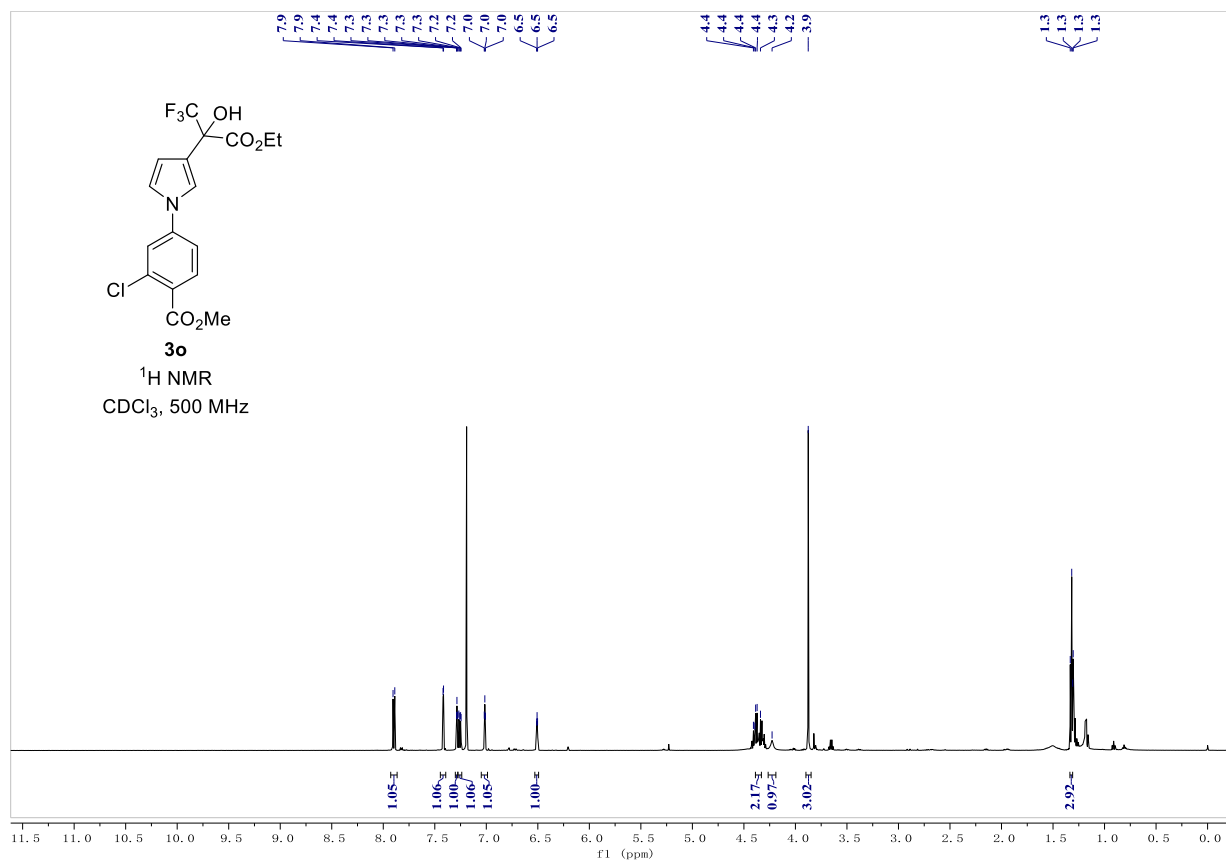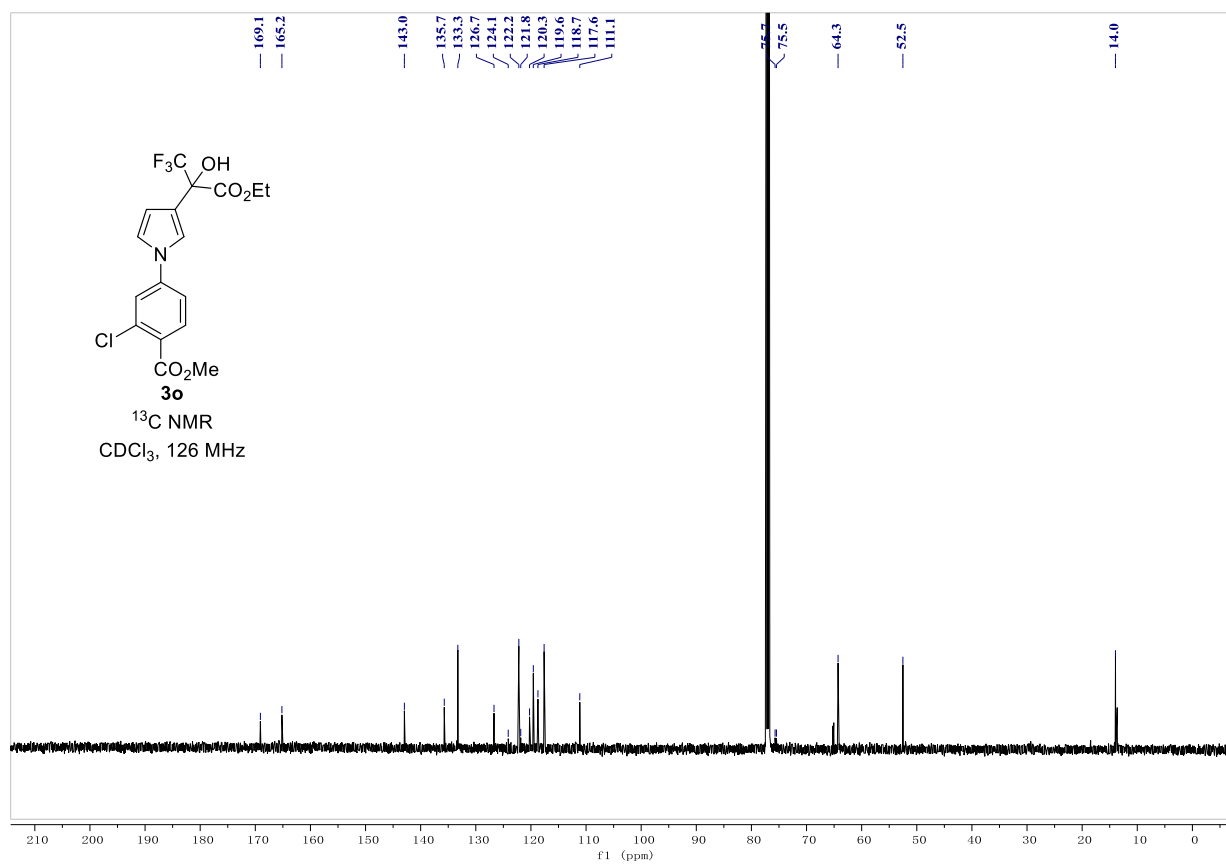

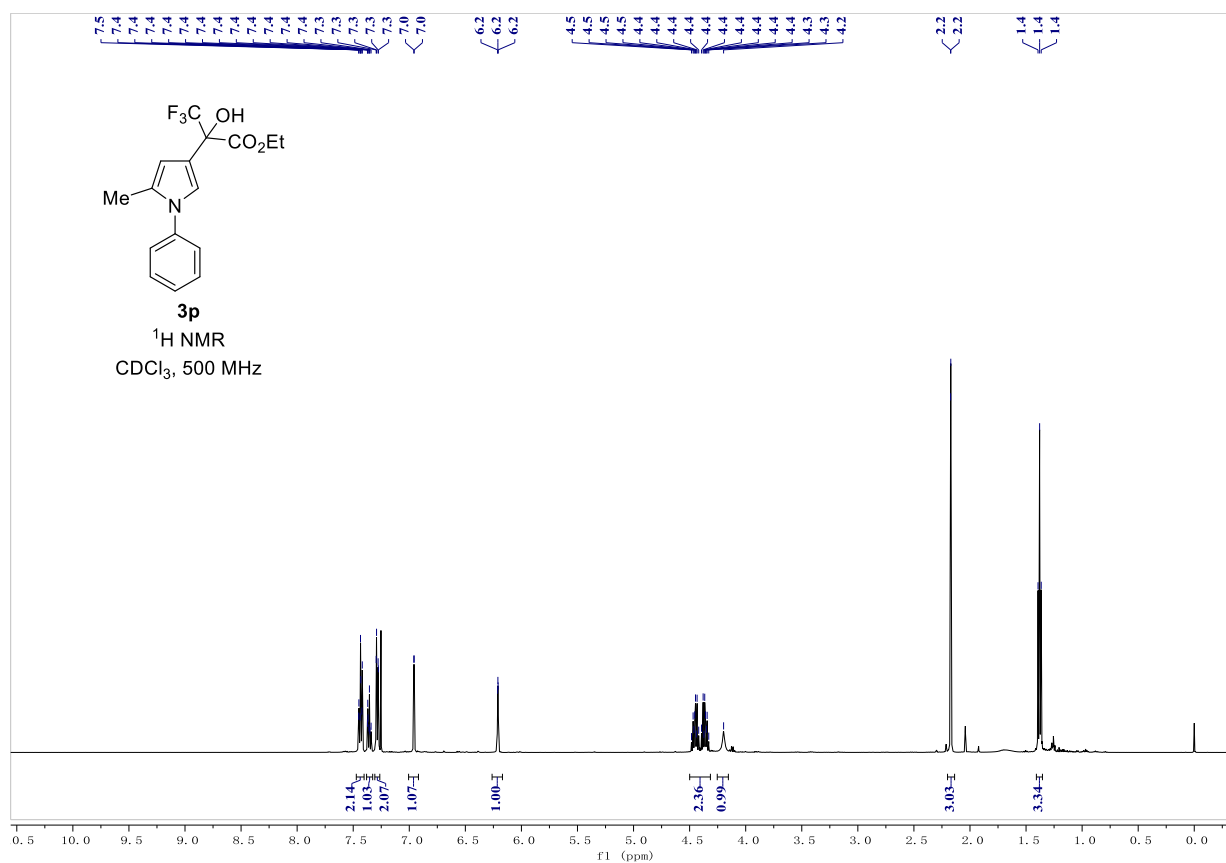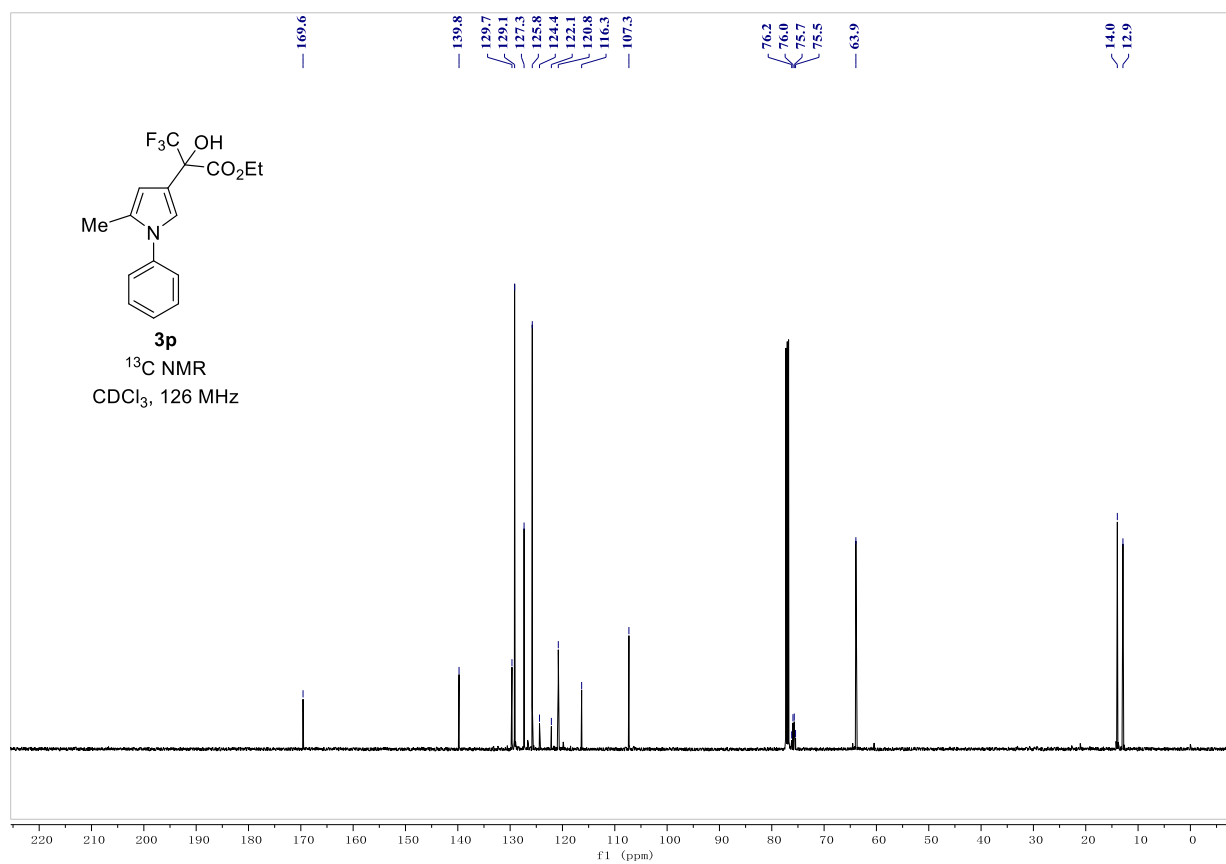

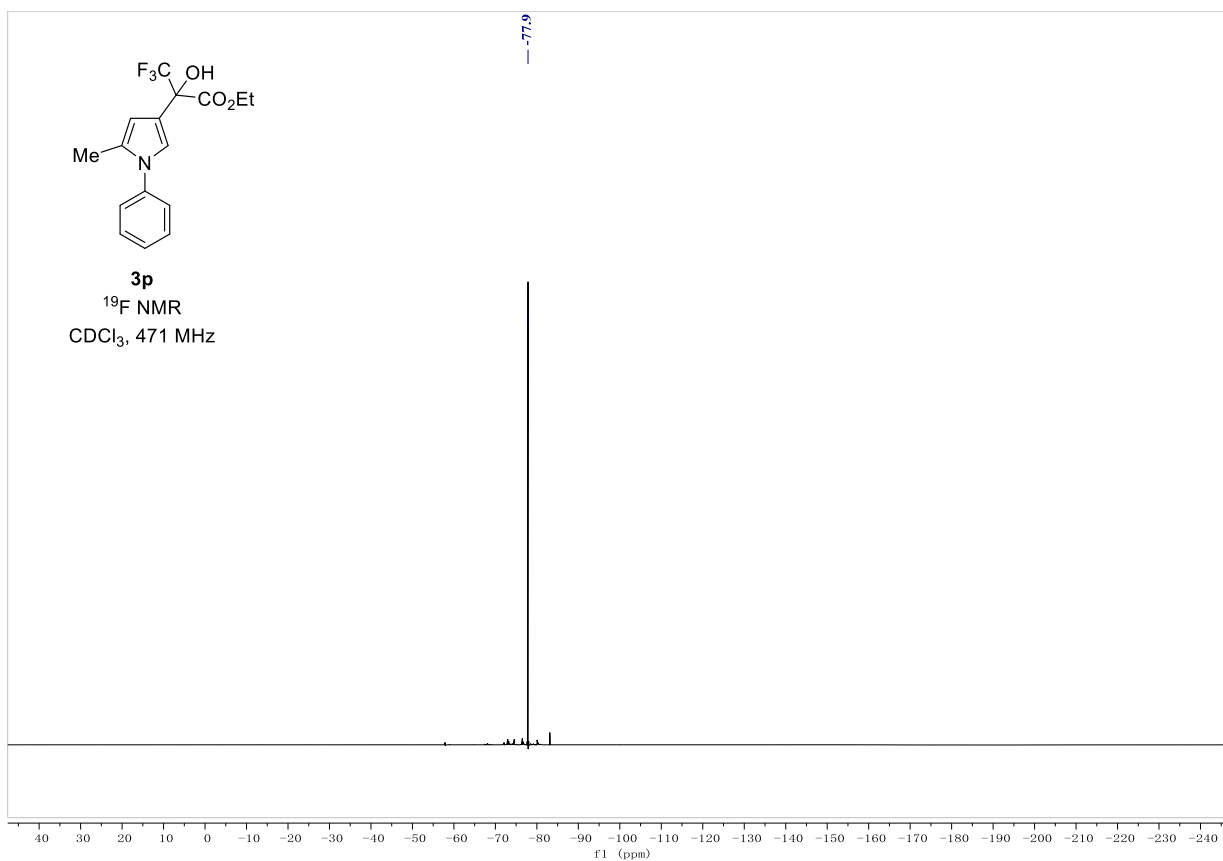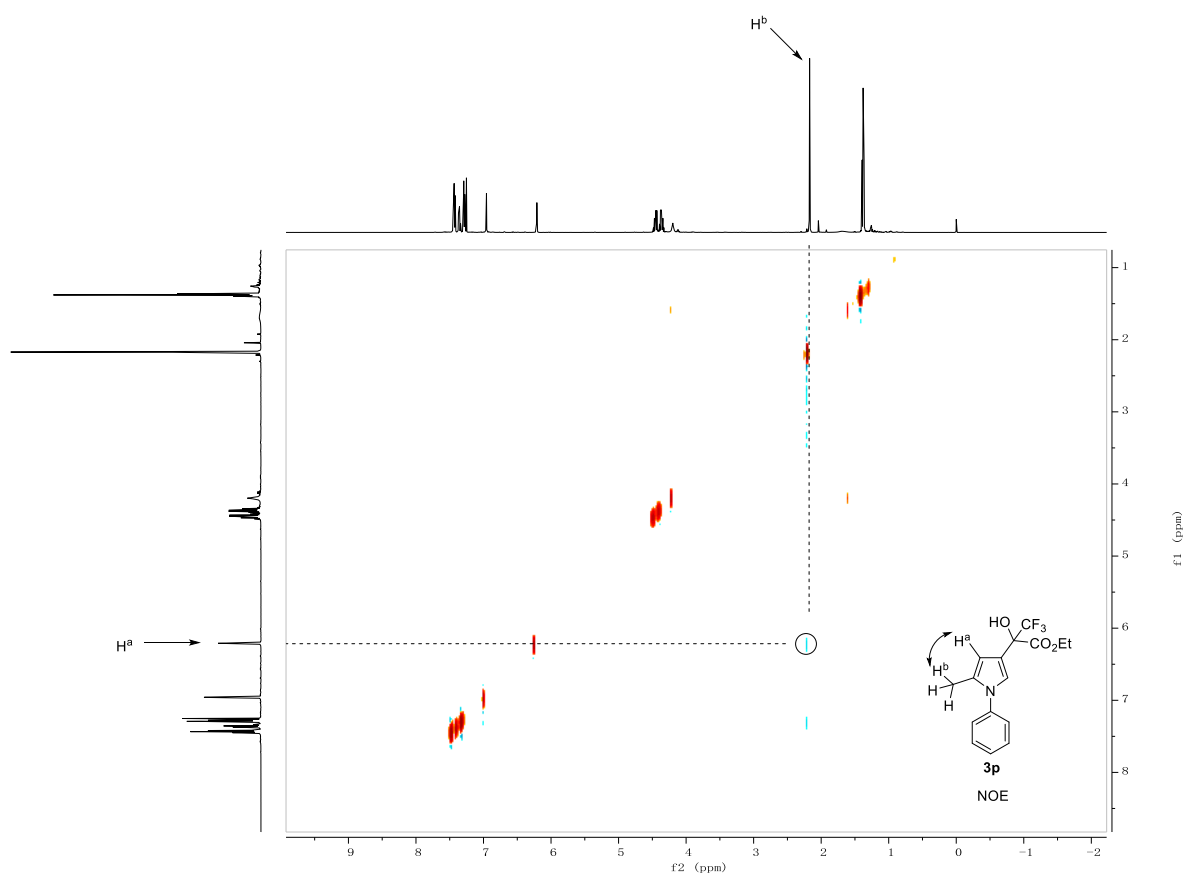







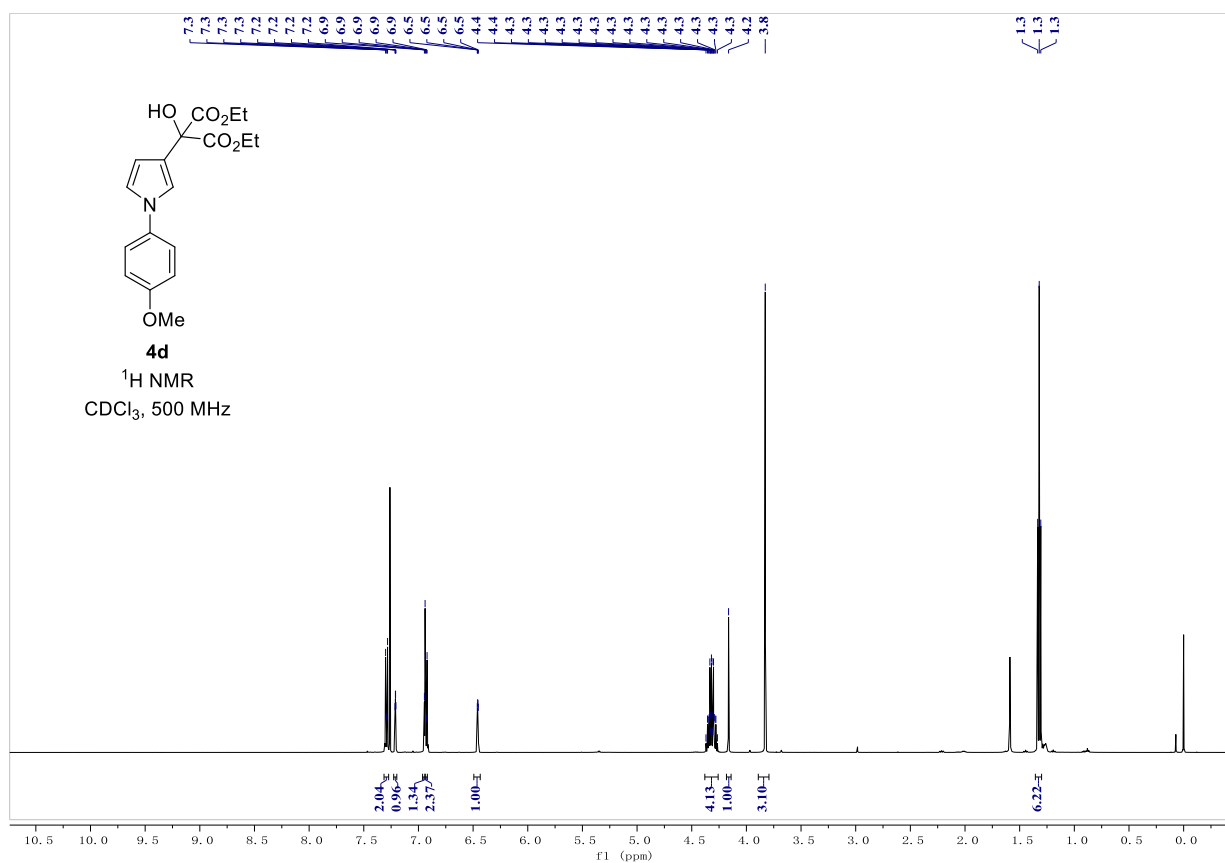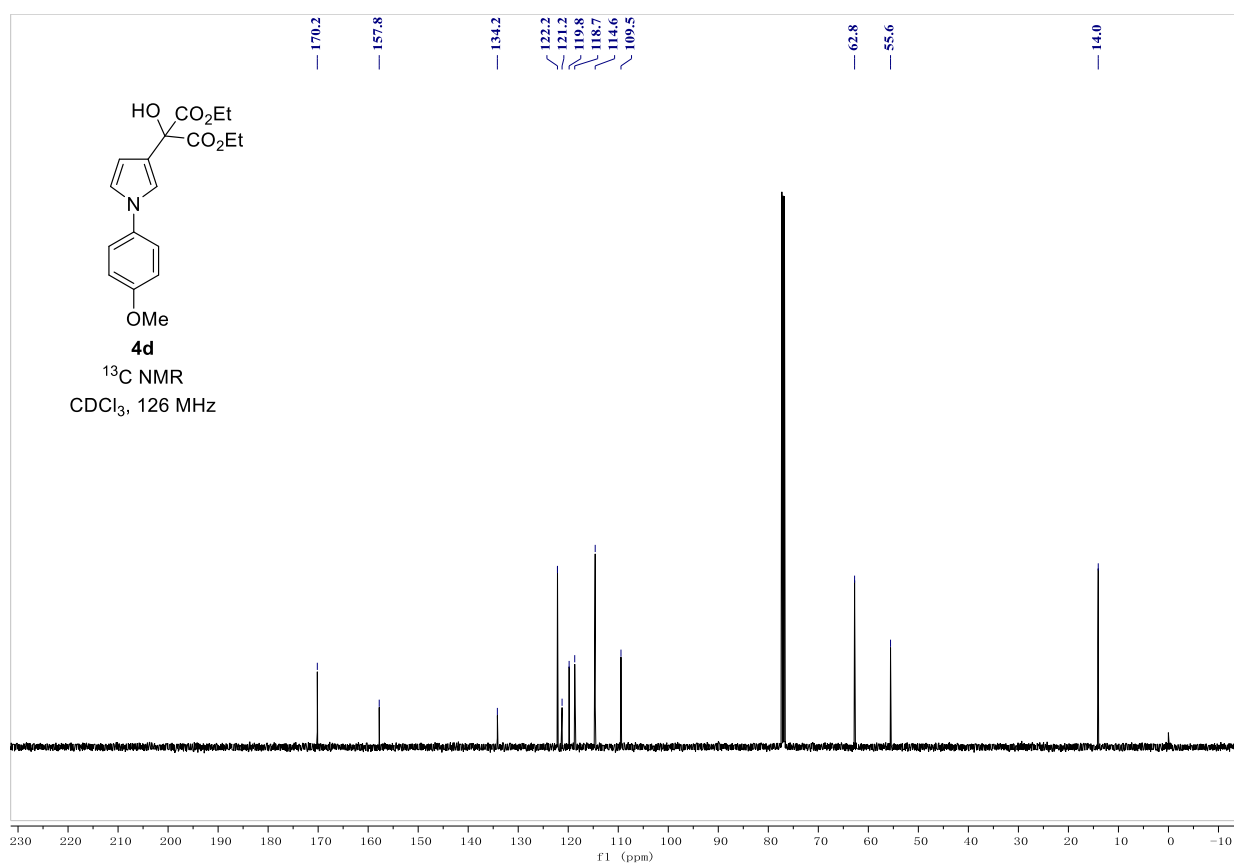



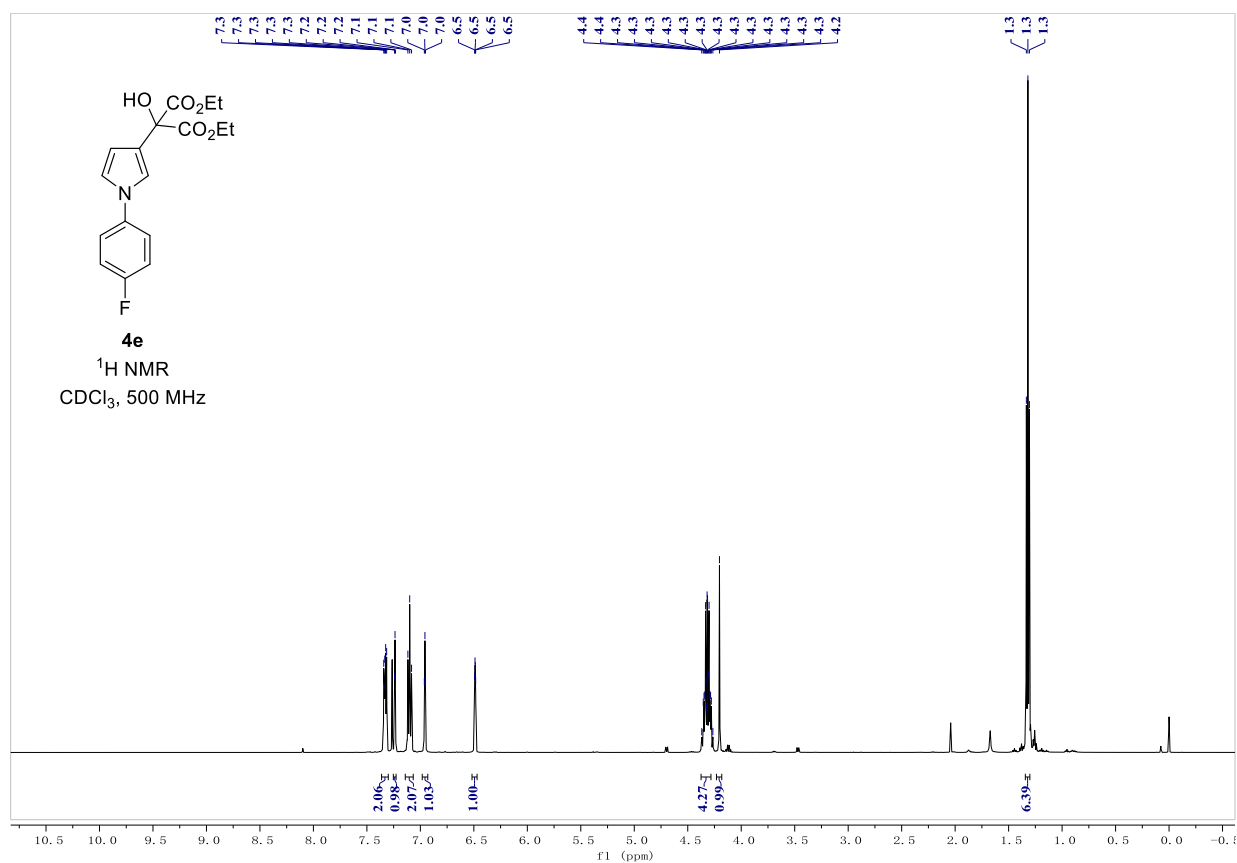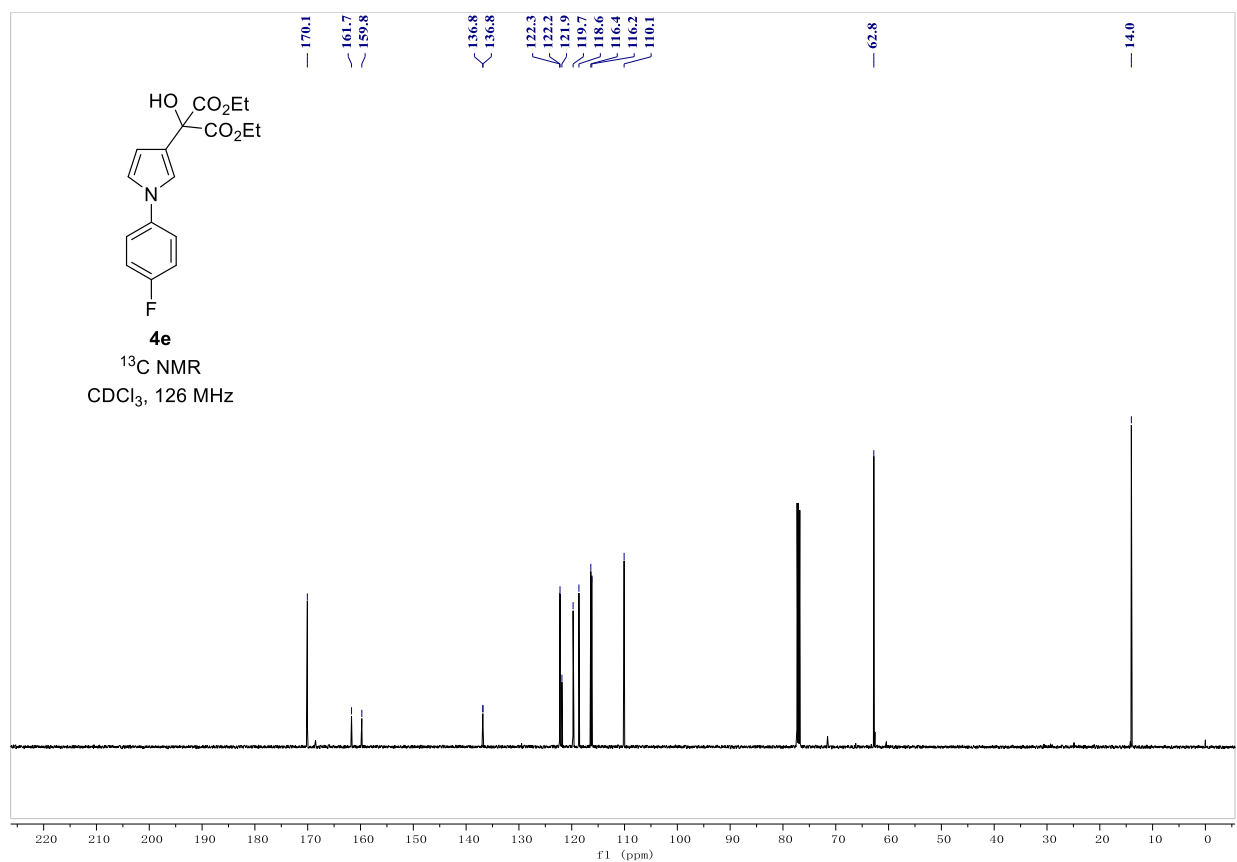



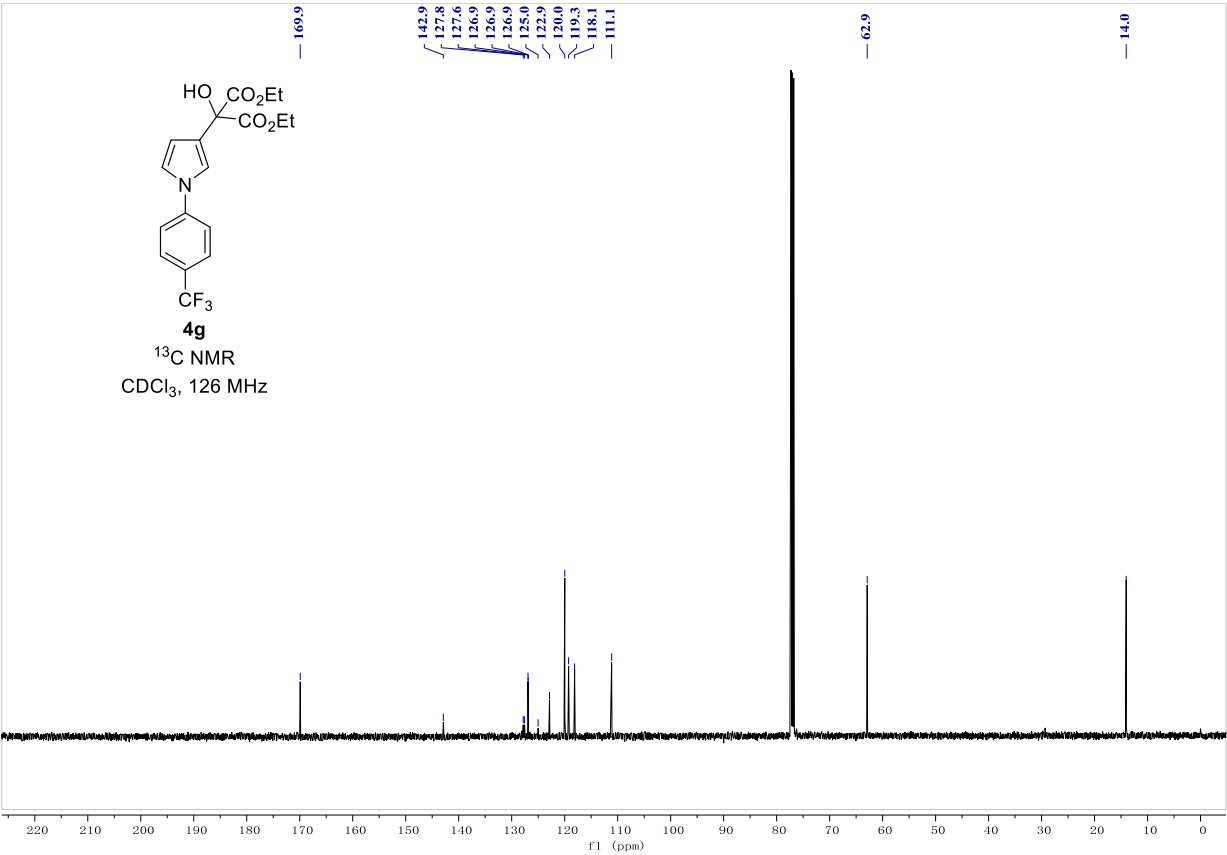

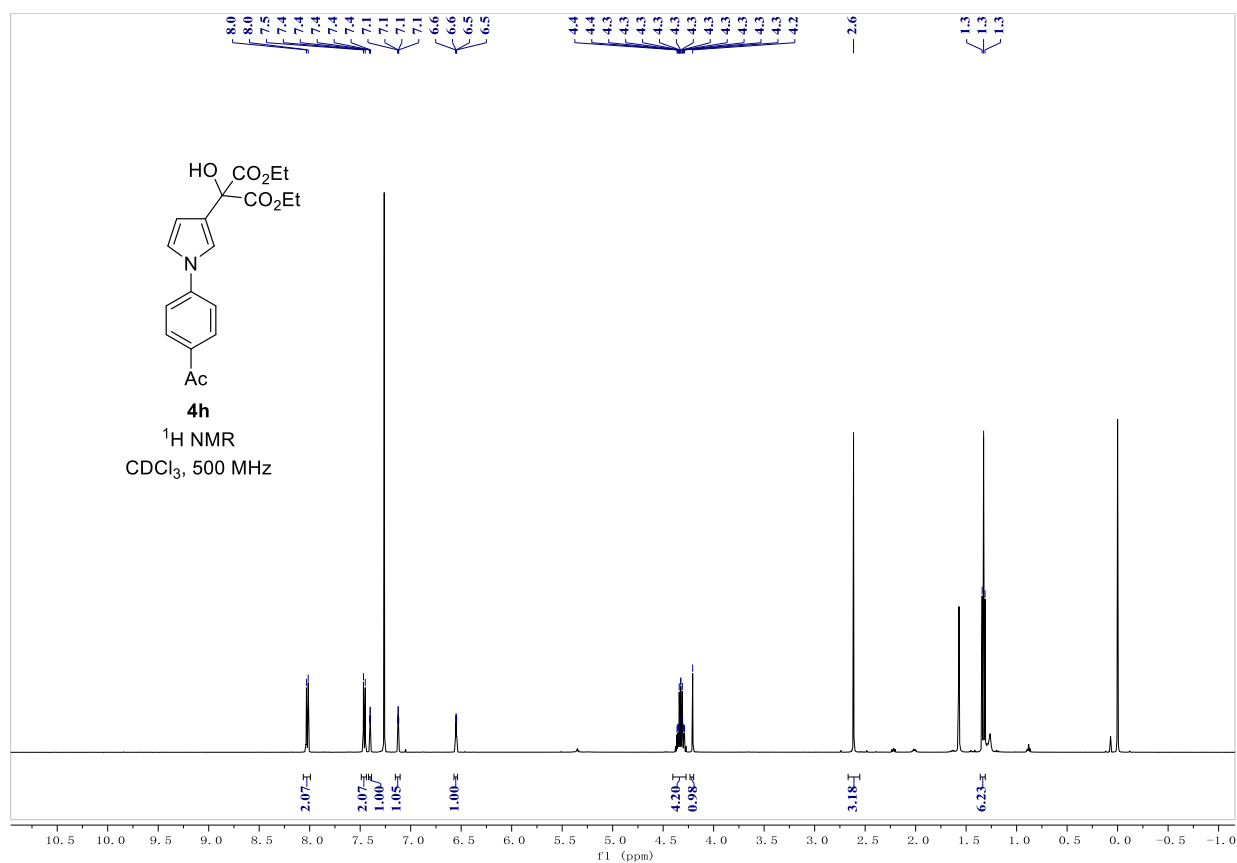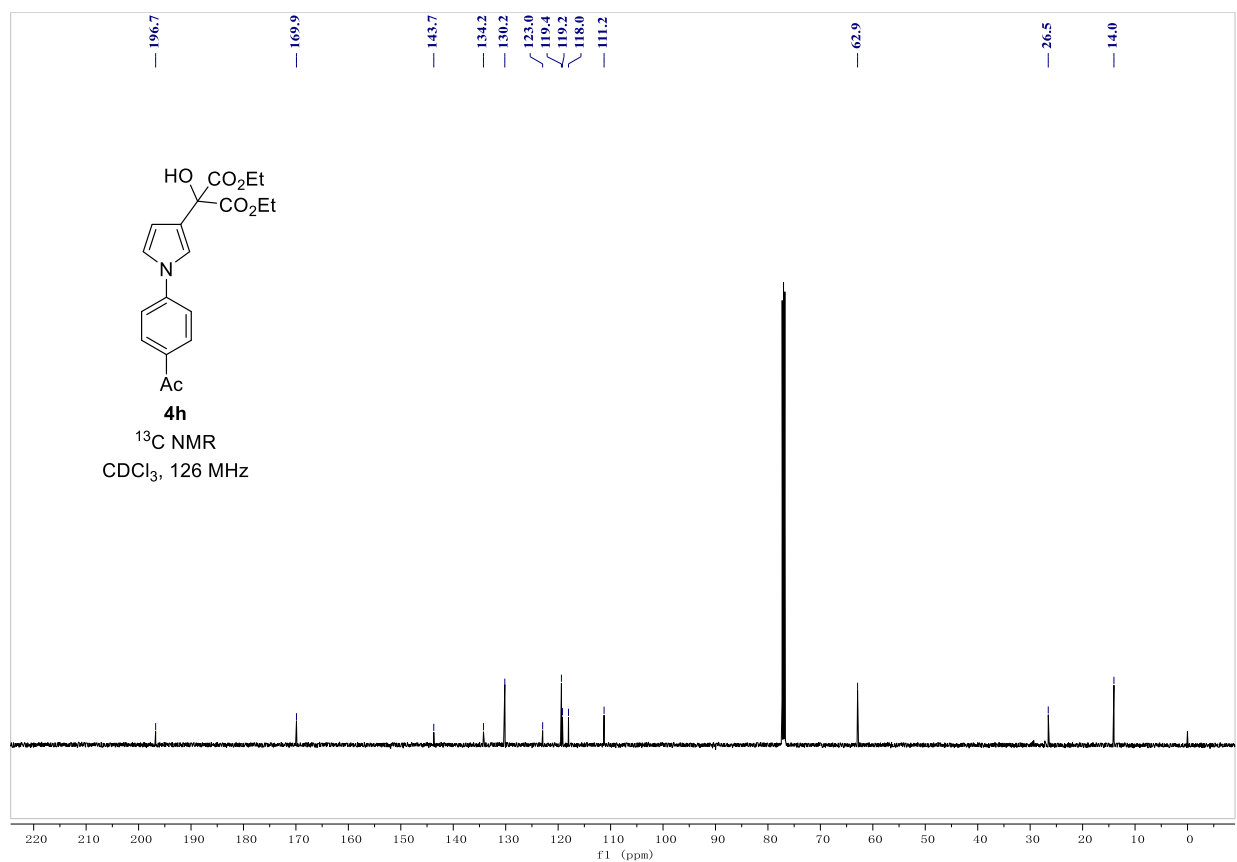

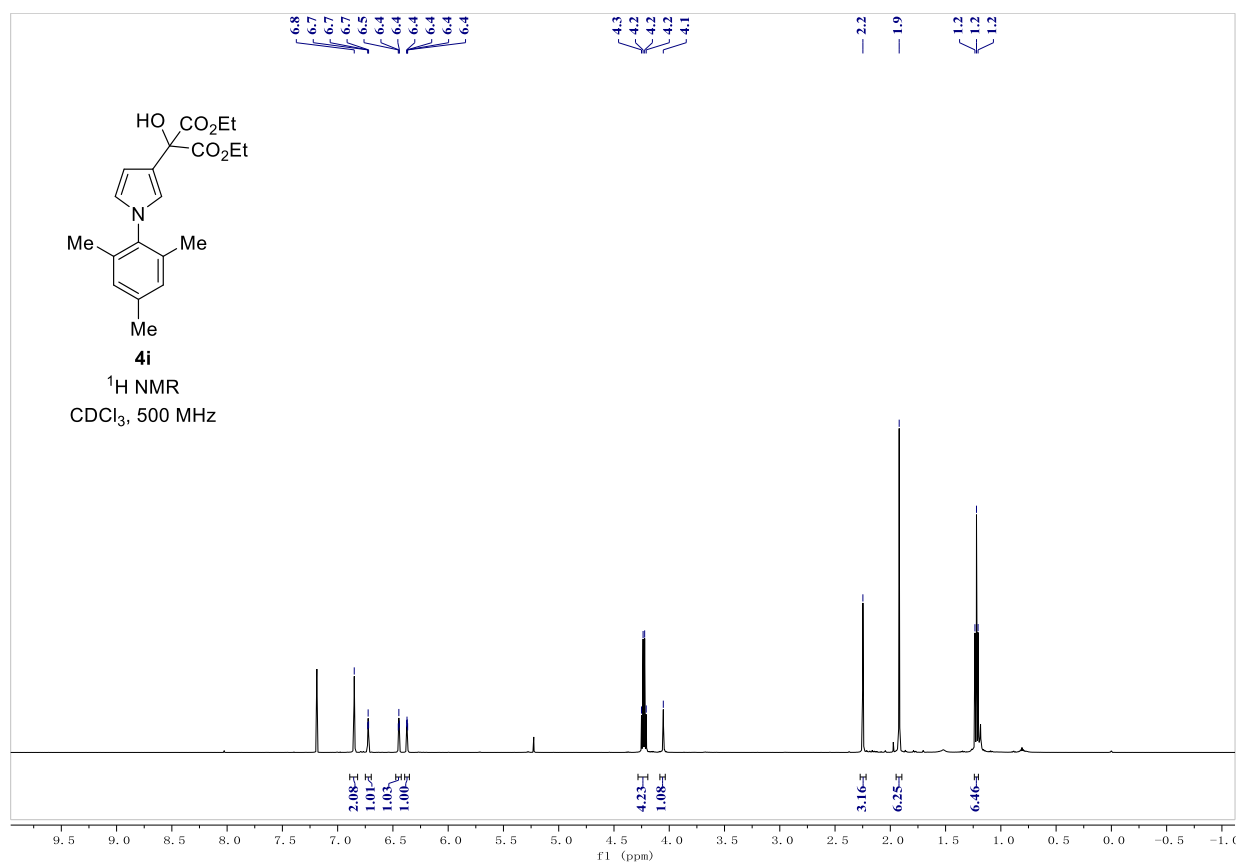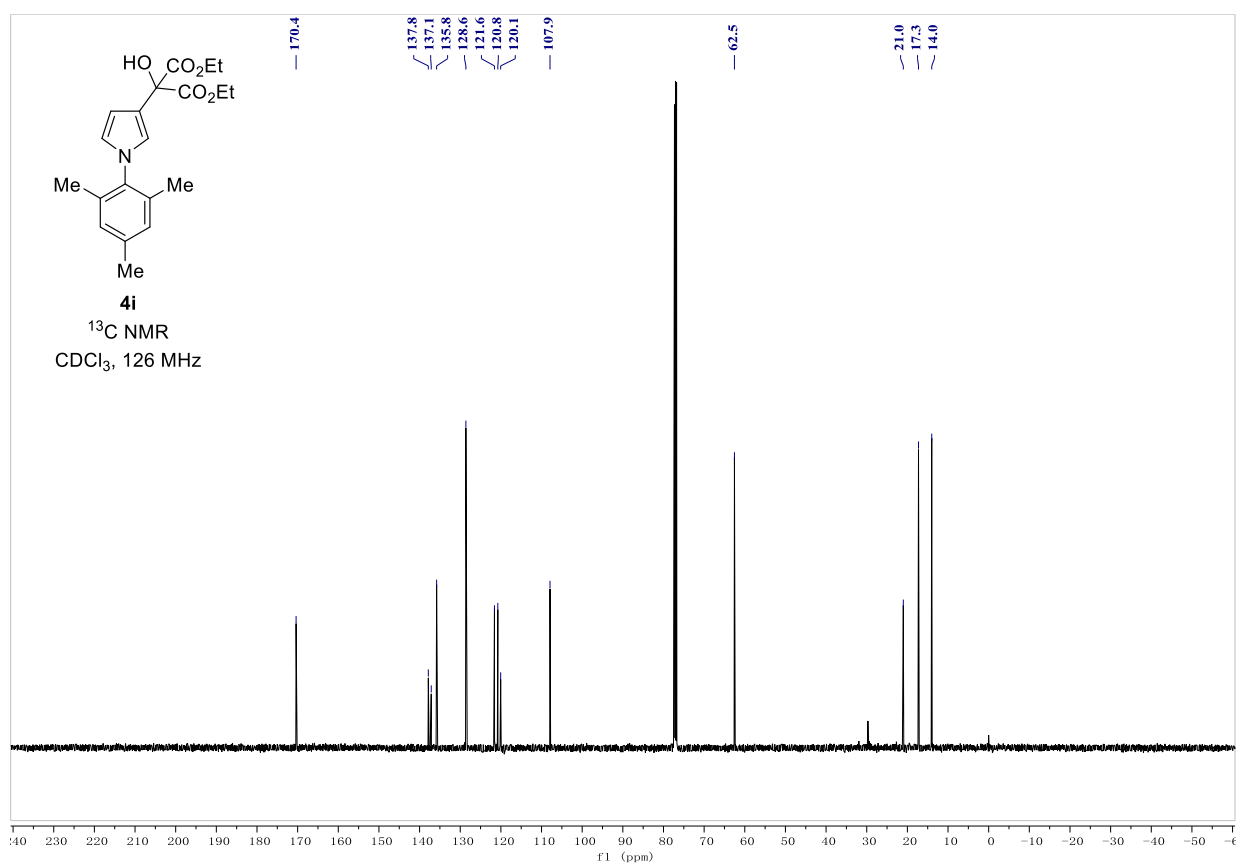



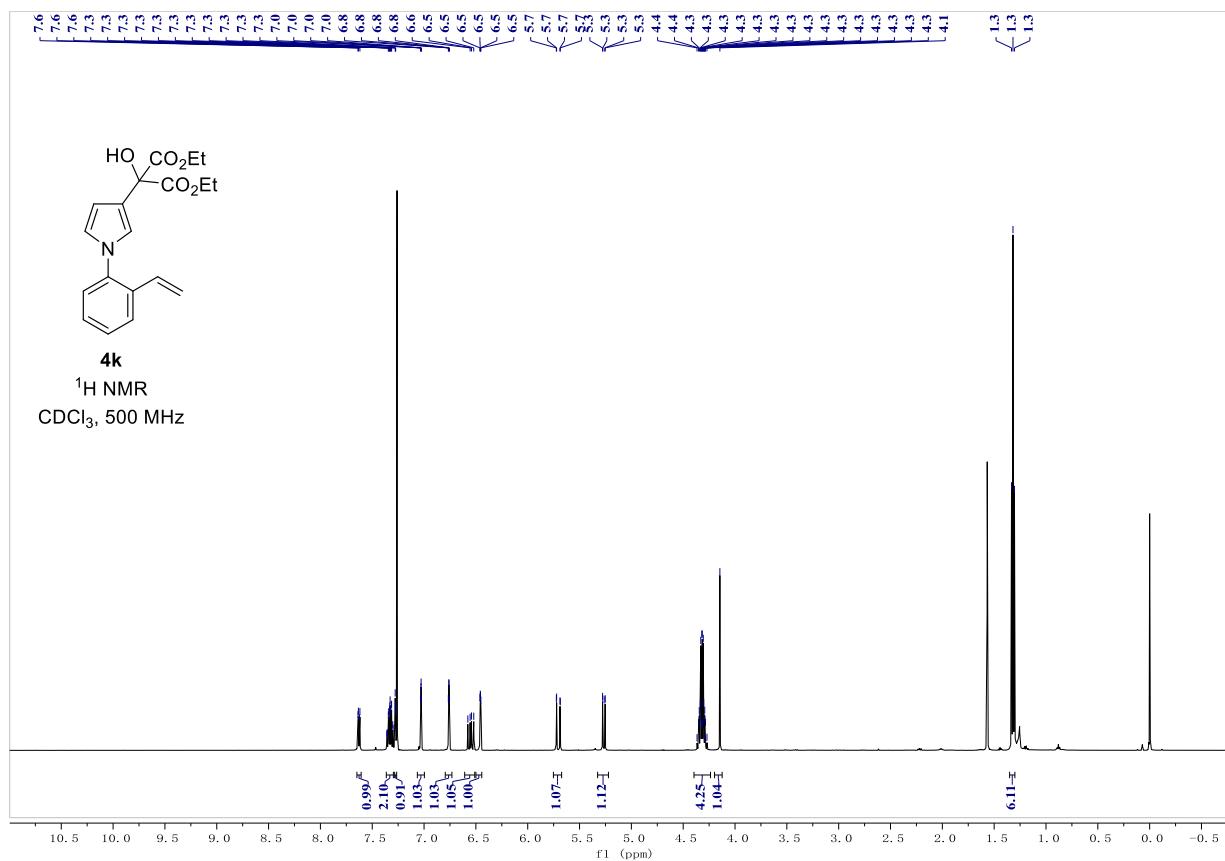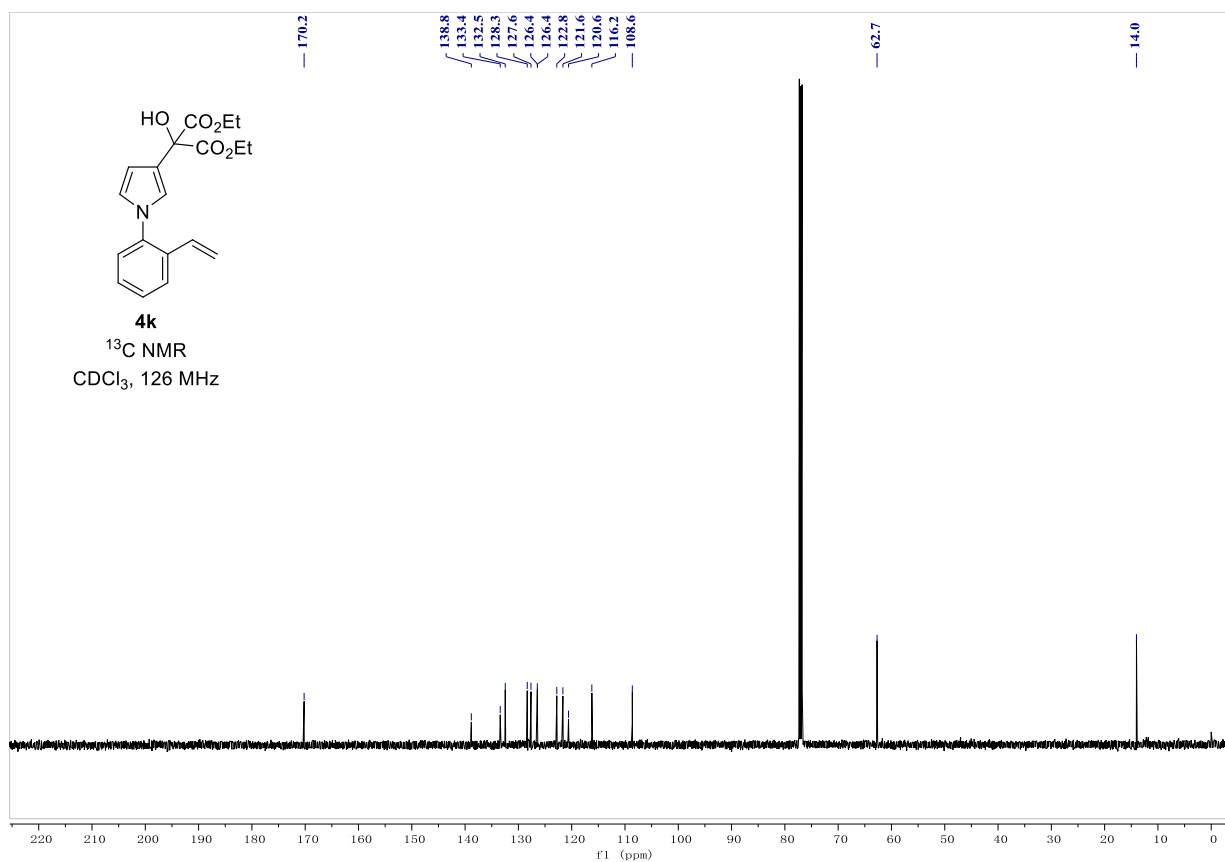





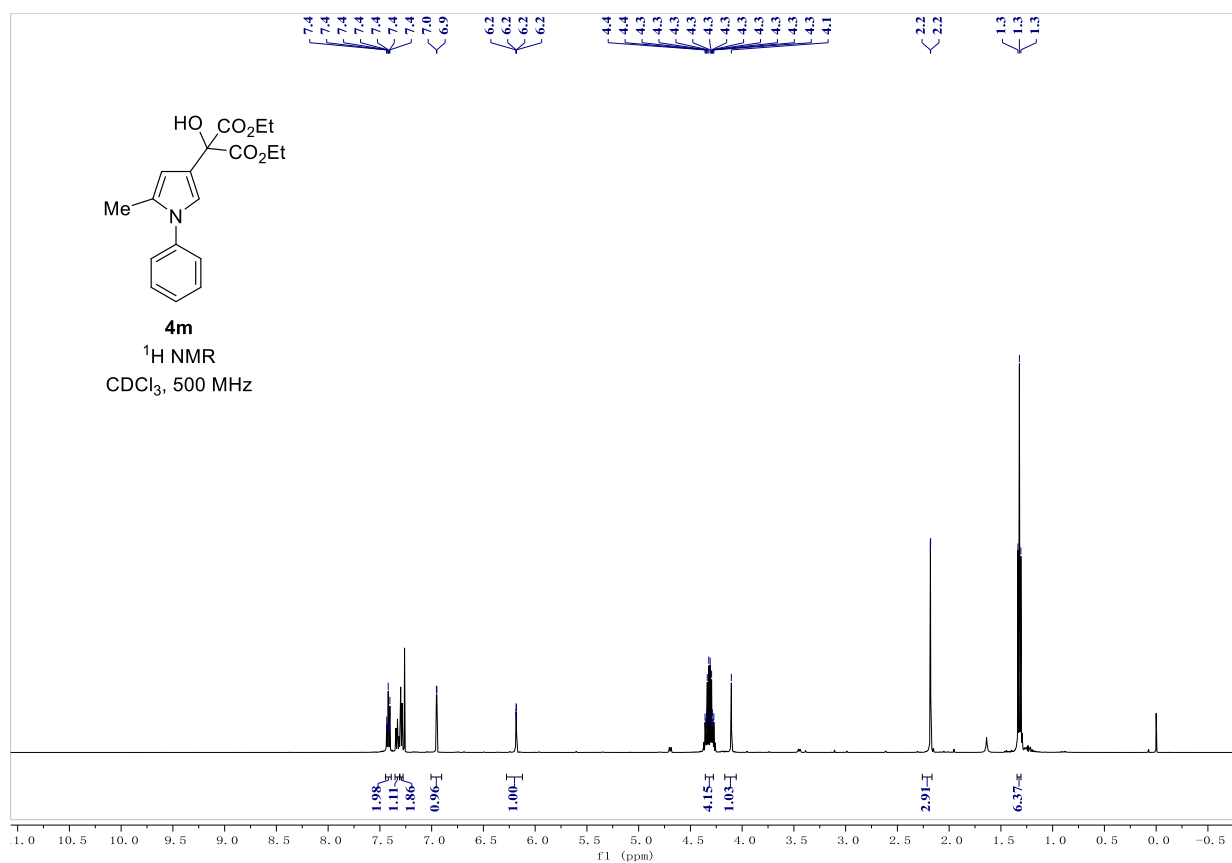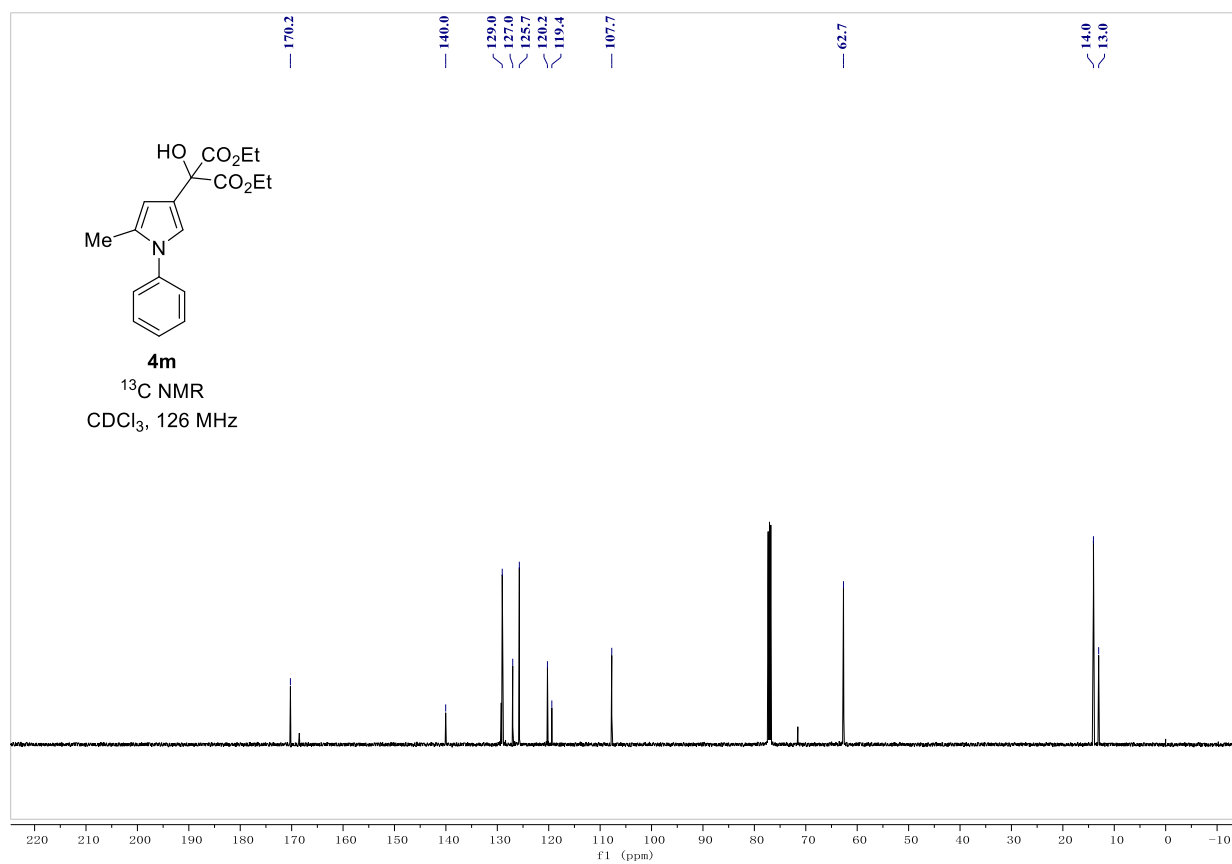

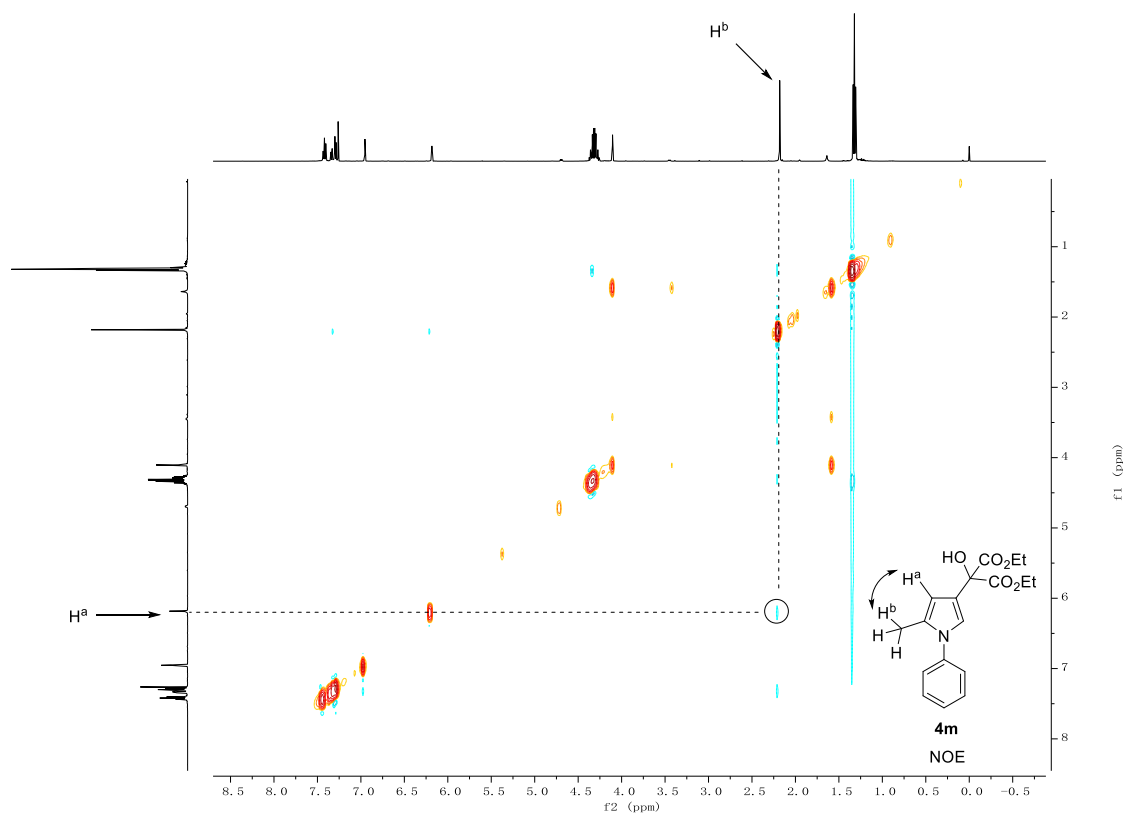

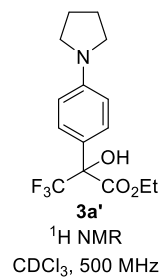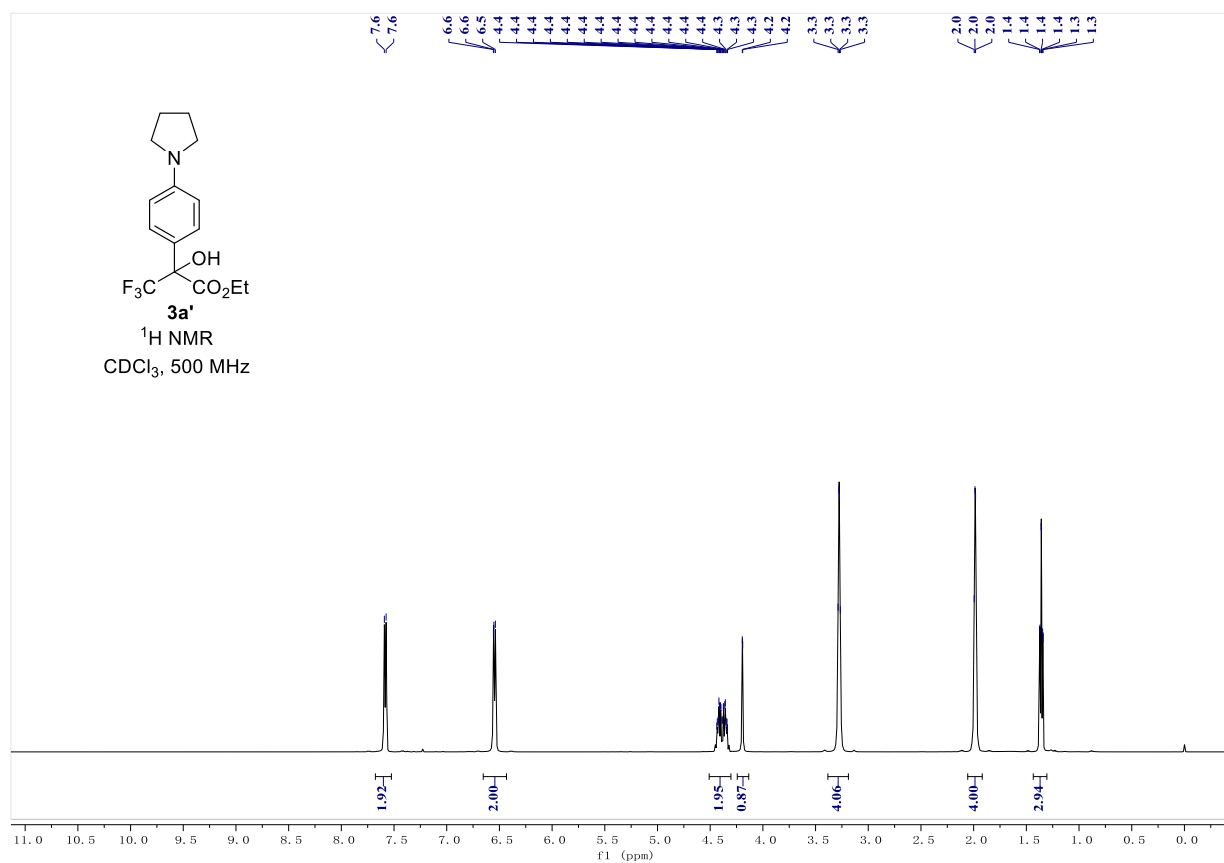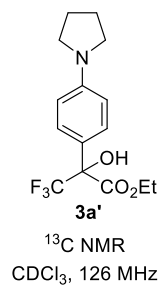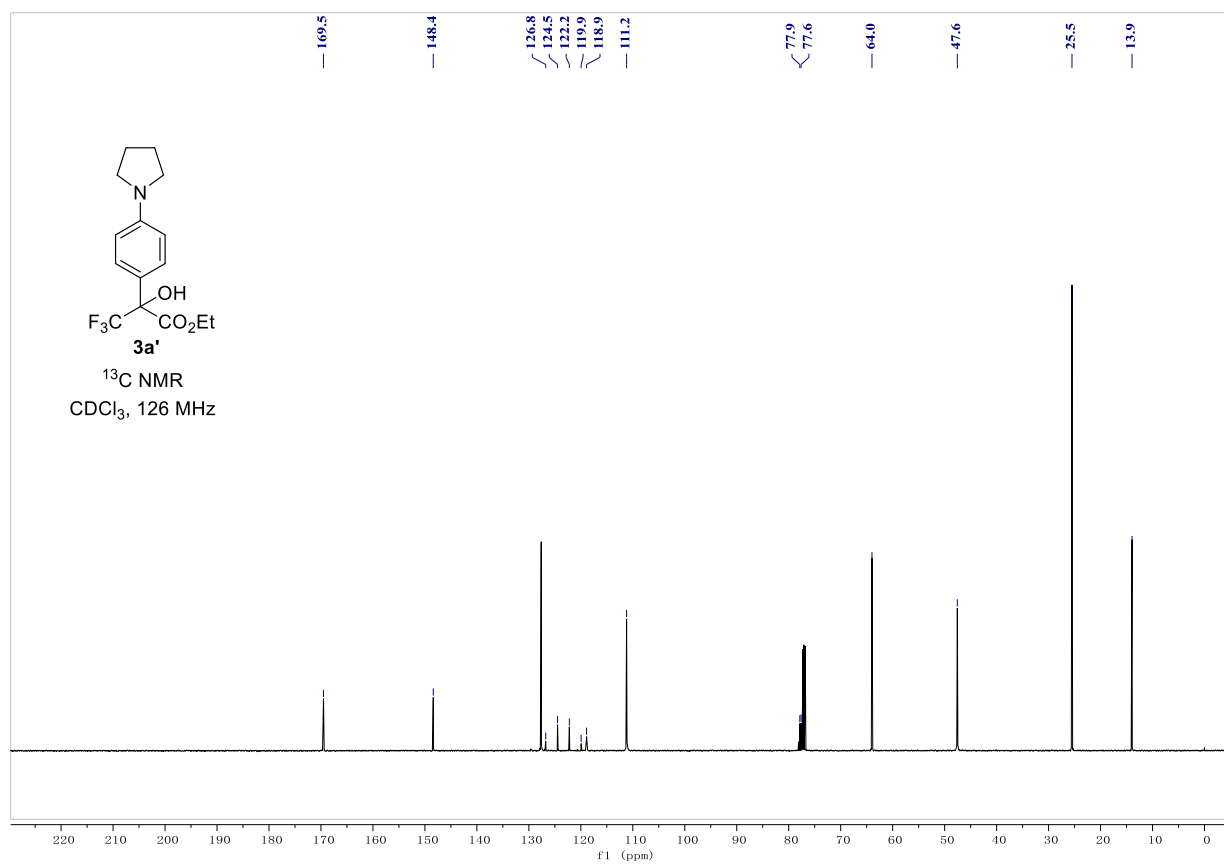

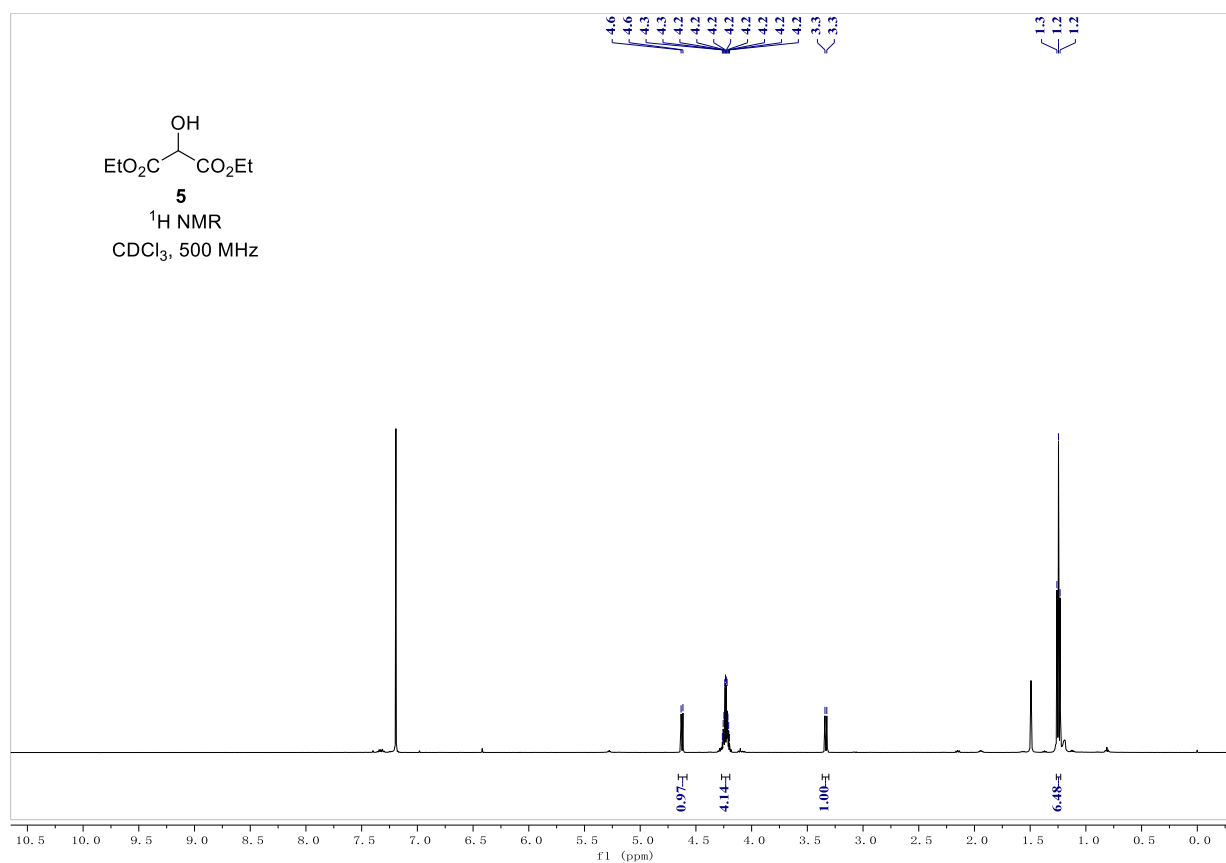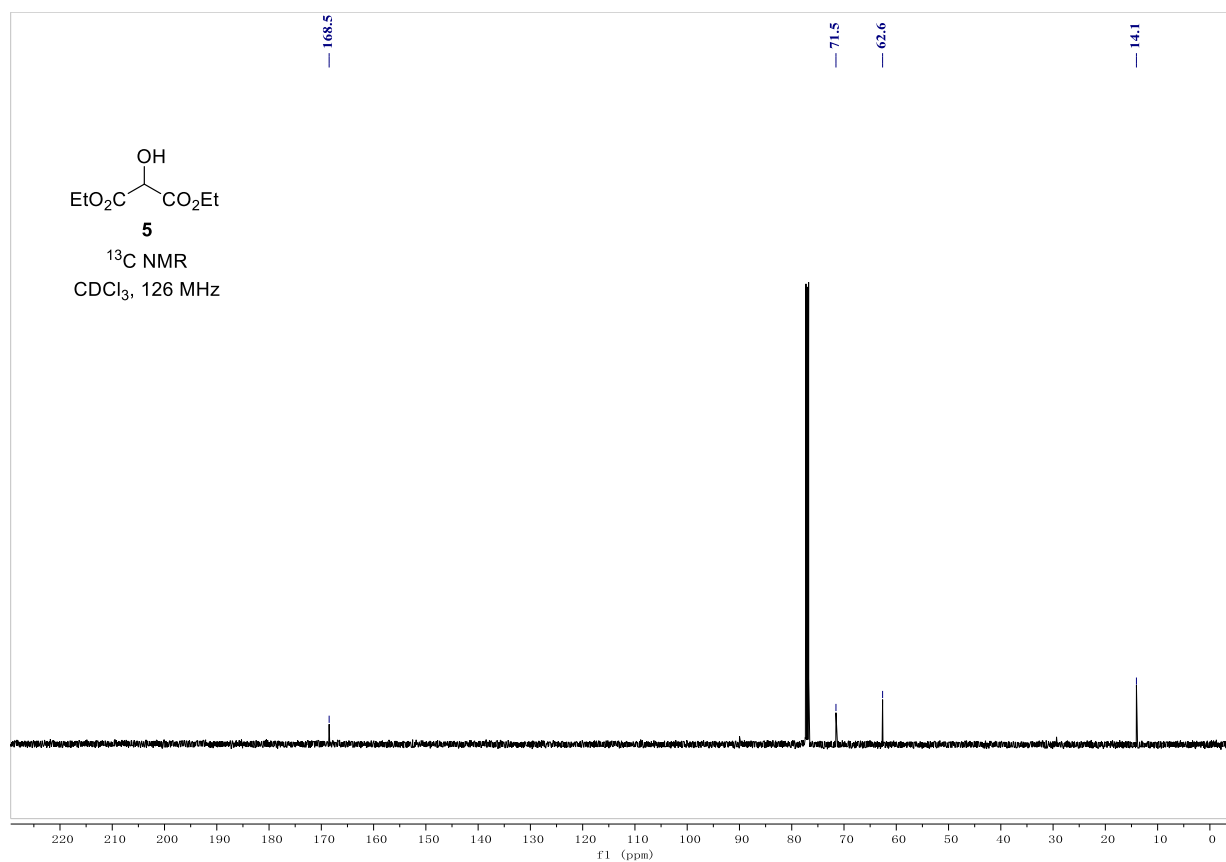

Supplement: Supplementary file 1 [file 23857149]
